# Supplementary material for: A facile route to isoflavone quinones via the direct cross-coupling of chromones and quinones
Source: Royal Society of Chemistry journal article supplement (doi:10.1039/c2cc33204c), 2012-01-01

## *Supporting Information*

# **A Facile Route to Isoflavone Quinones via the Direct Cross-Coupling of Chromones and Quinones**

*Youngtaek Moon and Sungwoo Hong\**

*Department of Chemistry, Korea Advance Institute of Science and Technology (KAIST),  
Daejeon 305-701, Korea*

**I. General Methods and Materials** S2

**II. Experimental Procedure** S2

*Appendix I*

**Spectral Copies of <sup>1</sup>H- and <sup>13</sup>C-NMR Data Obtained in this Study** S16

**I. General Methods and Materials.** Unless stated otherwise, reactions were performed in flame-dried glassware under a positive pressure of nitrogen. Analytical thin layer chromatography (TLC) was performed on precoated silica gel 60 F<sup>254</sup> plates and visualization on TLC was achieved by UV light (254 and 354 nm). Flash column chromatography was undertaken on silica gel (400-630 mesh). <sup>1</sup>H NMR was recorded on 300 MHz or 400 MHz and chemical shifts were quoted in parts per million (ppm) referenced to the appropriate solvent peak or 0.0 ppm for tetramethylsilane. The following abbreviations were used to describe peak splitting patterns when appropriate: br = broad, s = singlet, d = doublet, t = triplet, q = quartet, m = multiplet, dd = doublet of doublet, td = doublet of triplet. Coupling constants, *J*, were reported in hertz unit (Hz). <sup>13</sup>C NMR was recorded on 100 MHz and was fully decoupled by broad band proton decoupling. Chemical shifts were reported in ppm referenced to the center line of a triplet at 77.0 ppm of Chloroform-d. High-resolution mass spectrometry (HRMS) data were recorded on LC-TOF. Unless otherwise stated, all commercial reagents and solvents were used without additional purification.

## II. Experimental Procedure

**General procedure (GP):** Chromone derivative (0.088 mmol), quinone (4 equiv), Pd(OAc)<sub>2</sub> (0.2 equiv), AgOAc (2.5 equiv) and PivOH (2 equiv) were combined in dioxane (1 mL) in a cap test tube. The reaction mixture was heated to 100 °C. The reaction was stirred for 12–24 h until the starting material, chromone derivative disappeared (monitored by TLC using EtOAc and *n*-hexane = 1:3 as the mobile phase). After cooled to RT, the dioxane solvent was removed under reduced pressure. The reaction mixture was diluted with CH<sub>2</sub>Cl<sub>2</sub> and the aqueous NaHCO<sub>3</sub> was added to neutralize the PivOH. After stirring the mixture for 10 min, the residue was extracted with aqueous NH<sub>4</sub>Cl (3×30 ml). The organic layer was dried over MgSO<sub>4</sub>. After removal of solvent, the residue was purified by flash chromatography on silica gel to give desired product.

### Compound characterizations:

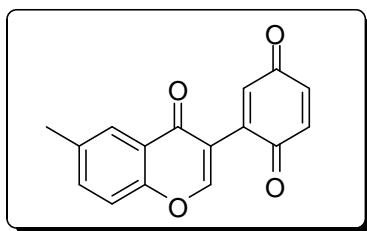

**2-(6-methyl-4-oxo-4H-chromen-3-yl)cyclohexa-2,5-diene-1,4-dione (3a).** Yield 89% (20.4 mg) as yellow solid; mp 183–185 °C;  $^1\text{H}$  NMR (300 MHz, Chloroform- $d$ )  $\delta$  8.19 (s, 1H), 8.01 (d,  $J$  = 2.1 Hz, 1H), 7.50 (dd,  $J$  = 8.6, 2.2 Hz, 1H), 7.42 – 7.31 (m, 2H), 6.91 – 6.76 (m, 2H), 2.45 (s, 3H);  $^{13}\text{C}$  NMR (100 MHz,  $\text{CDCl}_3$ )  $\delta$  187.2, 185.8, 175.0, 156.9, 153.9, 137.2, 136.9, 136.4, 136.0, 135.6, 135.4, 125.7, 123.8, 117.9, 116.1, 21.0; HRMS ( $\text{EI}^+$ )  $m/z$  calcd. for  $\text{C}_{16}\text{H}_{10}\text{NaO}_4^+$  [ $\text{M}+\text{Na}$ ] $^+$ : 289.0471, found: 289.0475.

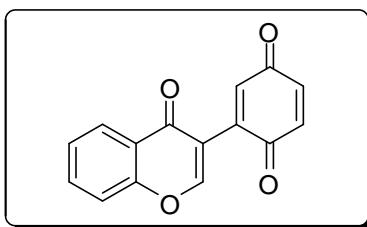

**2-(4-oxo-4H-chromen-3-yl)cyclohexa-2,5-diene-1,4-dione (3b).** Yield 74% (16.6 mg) as yellow solid; mp 210–212 °C;  $^1\text{H}$  NMR (300 MHz, Chloroform- $d$ )  $\delta$  8.23 (d,  $J$  = 6.9 Hz, 2H), 7.70 (ddd,  $J$  = 8.8, 7.1, 1.7 Hz, 1H), 7.45 (dd,  $J$  = 16.8, 8.3 Hz, 2H), 7.34 (d,  $J$  = 2.3 Hz, 1H), 6.91 – 6.75 (m, 2H);  $^{13}\text{C}$  NMR (100 MHz,  $\text{CDCl}_3$ )  $\delta$  187.2, 185.8, 175.0, 157.0, 155.6, 137.0, 136.9, 136.4, 135.7, 134.2, 126.4, 125.9, 124.1, 118.1, 116.3; HRMS ( $\text{EI}^+$ )  $m/z$  calcd. for  $\text{C}_{15}\text{H}_8\text{NaO}_4^+$  [ $\text{M}+\text{Na}$ ] $^+$ : 275.0315, found: 275.0338.

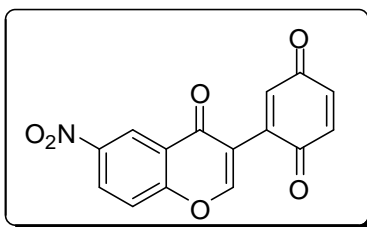

**2-(6-nitro-4-oxo-4H-chromen-3-yl)cyclohexa-2,5-diene-1,4-dione (3c).** Yield 66% (17.4 mg) as yellow solid; mp 212–214 °C;  $^1\text{H}$  NMR (300 MHz, Chloroform- $d$ )  $\delta$  9.11 (d,  $J$  = 2.8 Hz, 1H), 8.54 (dd,  $J$  = 9.2, 2.8 Hz, 1H), 8.30 (s, 1H), 7.67 (d,  $J$  = 9.1 Hz, 1H), 7.35 (d,  $J$  = 2.2 Hz, 1H), 7.00 – 6.75 (m, 2H);  $^{13}\text{C}$

NMR (100 MHz, CDCl<sub>3</sub>) δ 186.8, 185.3, 173.6, 158.3, 157.2, 145.2, 136.9, 136.6, 136.2, 135.9, 128.6, 124.2, 123.2, 120.0, 117.0; HRMS (EI<sup>+</sup>) m/z calcd. for C<sub>15</sub>H<sub>7</sub>NNaO<sub>6</sub><sup>+</sup> [M+Na]<sup>+</sup>: 320.0166, found: 320.0157.

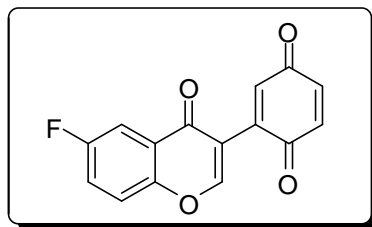

**2-(6-fluoro-4-oxo-4H-chromen-3-yl)cyclohexa-2,5-diene-1,4-dione (3d).** Yield 71% (16.9 mg) as yellow solid; mp 228–230 °C; <sup>1</sup>H NMR (300 MHz, Chloroform-d) δ 8.24 (s, 1H), 7.87 (dd, *J* = 8.2, 3.0 Hz, 1H), 7.57 – 7.40 (m, 2H), 7.34 (d, *J* = 2.3 Hz, 1H), 6.91 – 6.77 (m, 2H); <sup>13</sup>C NMR (100 MHz, CDCl<sub>3</sub>) δ 187.1, 185.7, 174.3, 174.2, 161.1, 158.7, 157.2, 151.9, 151.9, 136.9, 136.7, 136.5, 135.8, 125.4, 125.3, 122.7, 122.4, 120.4, 120.3, 115.7, 111.5, 111.2; HRMS (EI<sup>+</sup>) m/z calcd. for C<sub>15</sub>H<sub>7</sub>FNao<sub>4</sub><sup>+</sup> [M+Na]<sup>+</sup>: 293.0221, found: 293.0215.

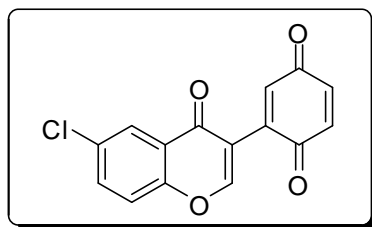

**2-(6-chloro-4-oxo-4H-chromen-3-yl)cyclohexa-2,5-diene-1,4-dione (3e).** Yield 92% (23.4 mg) as yellow solid; mp 226–228 °C; <sup>1</sup>H NMR (300 MHz, Chloroform-d) δ 8.23 (s, 1H), 8.19 (d, *J* = 2.6 Hz, 1H), 7.64 (dd, *J* = 8.9, 2.5 Hz, 1H), 7.46 (d, *J* = 8.9 Hz, 1H), 7.33 (d, *J* = 2.3 Hz, 1H), 6.90 – 6.77 (m, 2H); <sup>13</sup>C NMR (100 MHz, CDCl<sub>3</sub>) δ 187.0, 185.6, 173.8, 157.1, 154.0, 136.9, 136.6, 136.5, 135.9, 134.5, 132.0, 125.8, 125.0, 119.9, 116.4; HRMS (EI<sup>+</sup>) m/z calcd. for C<sub>15</sub>H<sub>7</sub>ClNaO<sub>4</sub><sup>+</sup> [M+Na]<sup>+</sup>: 308.9925, found: 308.9927.

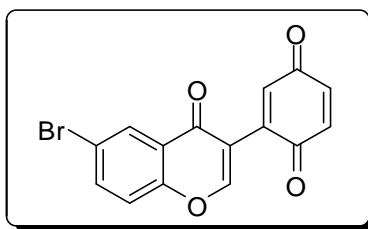

**2-(6-bromo-4-oxo-4H-chromen-3-yl)cyclohexa-2,5-diene-1,4-dione (3f).** Yield 93% (27.4 mg) as yellow solid; mp 217–219 °C;  $^1\text{H}$  NMR (300 MHz, Chloroform-d)  $\delta$  8.36 (d,  $J = 2.4$  Hz, 1H), 8.23 (s, 1H), 7.78 (dd,  $J = 8.9, 2.5$  Hz, 1H), 7.39 (d,  $J = 8.9$  Hz, 1H), 7.33 (d,  $J = 2.3$  Hz, 1H), 6.92 – 6.76 (m, 2H);  $^{13}\text{C}$  NMR (100 MHz,  $\text{CDCl}_3$ )  $\delta$  187.0, 185.6, 173.7, 157.1, 154.4, 137.3, 136.9, 136.6, 136.5, 135.8, 129.0, 125.4, 120.1, 119.4, 116.4; HRMS ( $\text{EI}^+$ )  $m/z$  calcd. for  $\text{C}_{15}\text{H}_7\text{BrNaO}_4^+$  [ $\text{M}+\text{Na}$ ] $^+$ : 352.9420, found: 352.9409.

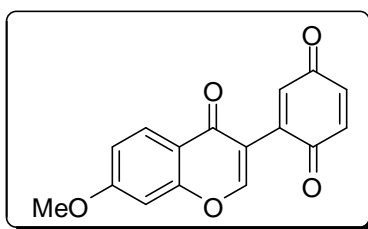

**2-(7-methoxy-4-oxo-4H-chromen-3-yl)cyclohexa-2,5-diene-1,4-dione (3g).** Yield 73% (18.2 mg) as yellow solid; mp 235–237 °C;  $^1\text{H}$  NMR (400 MHz, Chloroform-d)  $\delta$  8.15 – 8.12 (m, 2H), 7.34 (d,  $J = 2.4$  Hz, 1H), 7.00 (dd,  $J = 8.9, 2.4$  Hz, 1H), 6.86 – 6.79 (m, 3H), 3.91 (s, 3H);  $^{13}\text{C}$  NMR (100 MHz,  $\text{CDCl}_3$ )  $\delta$  187.2, 185.9, 174.3, 164.5, 157.4, 156.6, 137.2, 136.9, 136.4, 135.7, 127.9, 118.0, 116.3, 115.1, 100.3, 55.9; HRMS ( $\text{EI}^+$ )  $m/z$  calcd. for  $\text{C}_{16}\text{H}_{10}\text{NaO}_5^+$  [ $\text{M}+\text{Na}$ ] $^+$ : 305.0420, found: 305.0411.

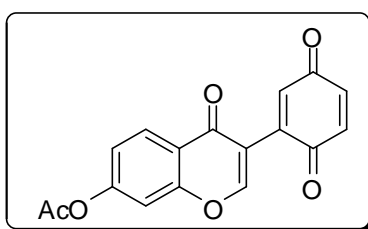

**3-(3,6-dioxocyclohexa-1,4-dienyl)-4-oxo-4H-chromen-7-yl acetate (3h).** Yield 90% (24.6 mg) as yellow solid; mp 185–187 °C;  $^1\text{H}$  NMR (400 MHz, Chloroform-d)  $\delta$  8.24 (dd,  $J = 8.7, 0.4$  Hz, 1H), 8.20

(s, 1H), 7.37 – 7.30 (m, 2H), 7.18 (dd,  $J = 8.7, 2.1$  Hz, 1H), 6.88 – 6.78 (m, 2H), 2.34 (s, 3H);  $^{13}\text{C}$  NMR (100 MHz,  $\text{CDCl}_3$ )  $\delta$  187.1, 185.6, 174.2, 168.3, 157.1, 156.1, 154.9, 136.9, 136.7, 136.4, 135.8, 127.8, 121.8, 120.1, 116.5, 111.0, 21.1; HRMS ( $\text{EI}^+$ )  $m/z$  calcd. for  $\text{C}_{17}\text{H}_{10}\text{NaO}_6^+$   $[\text{M}+\text{Na}]^+$ : 333.0370, found: 333.0368.

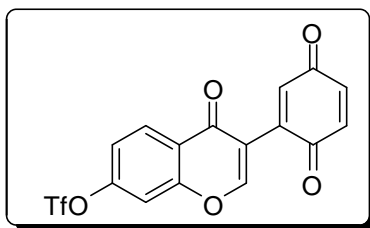

**3-(3,6-dioxocyclohexa-1,4-dienyl)-4-oxo-4H-chromen-7-yl trifluoromethanesulfonate (3i).** Yield 85% (30 mg) as yellow solid; mp 168–170 °C;  $^1\text{H}$  NMR (400 MHz, Chloroform- $d$ )  $\delta$  8.35 (d,  $J = 8.9$  Hz, 1H), 8.25 (s, 1H), 7.47 (d,  $J = 2.3$  Hz, 1H), 7.36 (dd,  $J = 8.9, 2.3$  Hz, 1H), 7.32 (d,  $J = 2.4$  Hz, 1H), 6.93 – 6.79 (m, 2H);  $^{13}\text{C}$  NMR (100 MHz,  $\text{CDCl}_3$ )  $\delta$  186.9, 185.4, 173.7, 157.4, 155.8, 152.5, 136.9, 136.5, 136.3, 136.0, 129.2, 123.8, 120.2, 119.3, 117.0, 111.6, 104.1; HRMS ( $\text{EI}^+$ )  $m/z$  calcd. for  $\text{C}_{16}\text{H}_7\text{F}_3\text{NaO}_7\text{S}^+$   $[\text{M}+\text{Na}]^+$ : 422.9757, found: 422.9752.

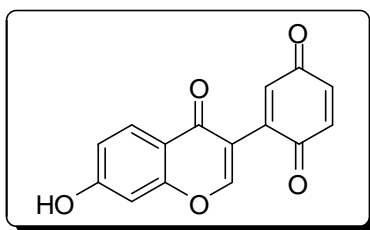

**2-(7-hydroxy-4-oxo-4H-chromen-3-yl)cyclohexa-2,5-diene-1,4-dione (3j).** Yield 63% (14.9 mg) as yellow solid; mp 206–208 °C;  $^1\text{H}$  NMR (300 MHz, Dimethyl sulfoxide- $d_6$ )  $\delta$  8.35 (s, 1H), 7.91 (d,  $J = 8.7$  Hz, 1H), 7.10 (d,  $J = 2.6$  Hz, 1H), 7.05 – 6.83 (m, 4H);  $^{13}\text{C}$  NMR (100 MHz,  $\text{DMSO-}d_6$ )  $\delta$  187.9, 185.7, 173.8, 163.5, 157.7, 156.9, 139.6, 137.6, 136.8, 135.0, 127.7, 117.3, 116.5, 116.1, 102.8; HRMS ( $\text{EI}^+$ )  $m/z$  calcd. for  $\text{C}_{15}\text{H}_8\text{NaO}_5^+$   $[\text{M}+\text{Na}]^+$ : 291.0264, found: 291.0259.

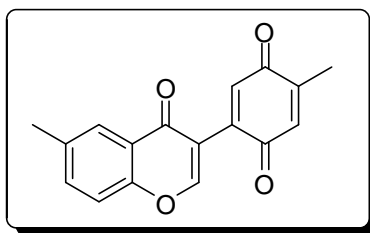

**2-methyl-5-(6-methyl-4-oxo-4H-chromen-3-yl)cyclohexa-2,5-diene-1,4-dione (3k, major).** Overall yield 81% (20 mg) as yellow solid; mp 163–165 °C;  $^1\text{H}$  NMR (300 MHz, Chloroform- $d$ )  $\delta$  8.20 (s, 1H), 8.01 (s, 1H), 7.50 (d,  $J = 8.6$  Hz, 1H), 7.37 (d,  $J = 10.2$  Hz, 2H), 6.68 (s, 1H), 2.45 (s, 3H), 2.08 (s, 3H);  $^{13}\text{C}$  NMR (100 MHz,  $\text{CDCl}_3$ )  $\delta$  187.3, 185.7, 174.6, 156.6, 153.4, 145.4, 136.4, 135.4, 135.2, 134.9, 133.1, 125.2, 123.3, 117.4, 115.5, 20.5, 15.0; HRMS ( $\text{EI}^+$ )  $m/z$  calcd. for  $\text{C}_{17}\text{H}_{12}\text{NaO}_4^+$   $[\text{M}+\text{Na}]^+$ : 303.0628, found: 303.0618.

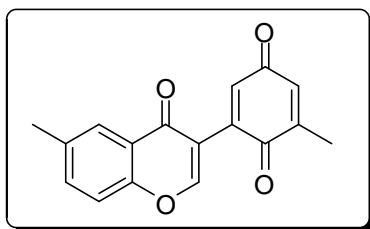

**2-methyl-6-(6-methyl-4-oxo-4H-chromen-3-yl)cyclohexa-2,5-diene-1,4-dione (3k).** Yellow solid; mp 208–210 °C;  $^1\text{H}$  NMR (300 MHz, Chloroform- $d$ )  $\delta$  8.13 (s, 1H), 8.01 (s, 1H), 7.50 (d,  $J = 9.0$  Hz, 1H), 7.38 (d,  $J = 8.6$  Hz, 1H), 7.17 (d,  $J = 2.6$  Hz, 1H), 6.65 (s, 1H), 2.45 (s, 3H), 2.10 (d,  $J = 1.6$  Hz, 3H);  $^{13}\text{C}$  NMR (100 MHz,  $\text{CDCl}_3$ )  $\delta$  187.2, 186.2, 175.1, 156.2, 154.1, 146.2, 137.9, 135.9, 135.6, 135.4, 133.3, 125.7, 123.8, 117.9, 117.1, 21.0, 16.4; HRMS ( $\text{EI}^+$ )  $m/z$  calcd. for  $\text{C}_{17}\text{H}_{12}\text{NaO}_4^+$   $[\text{M}+\text{Na}]^+$ : 303.0628, found: 303.0618.

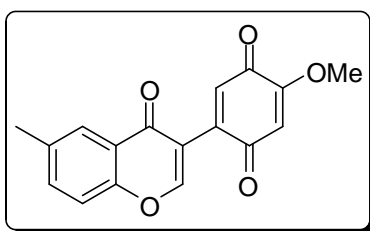

**2-methoxy-5-(6-methyl-4-oxo-4H-chromen-3-yl)cyclohexa-2,5-diene-1,4-dione (3l, major).** Overall yield 77% (19.9 mg) as yellow solid; mp 225–227 °C;  $^1\text{H}$  NMR (300 MHz, Chloroform- $d$ )  $\delta$  8.22 (s, 1H),

8.01 (s, 1H), 7.50 (dd,  $J = 8.5, 2.1$  Hz, 1H), 7.37 (d,  $J = 11.2$  Hz, 2H), 6.01 (s, 1H), 3.85 (s, 3H), 2.45 (s, 3H);  $^{13}\text{C}$  NMR (100 MHz,  $\text{CDCl}_3$ )  $\delta$  186.1, 181.9, 175.1, 158.6, 157.6, 153.8, 137.3, 135.9, 135.4, 133.7, 125.7, 123.8, 117.8, 115.8, 107.9, 56.3, 21.0; HRMS ( $\text{EI}^+$ )  $m/z$  calcd. for  $\text{C}_{17}\text{H}_{12}\text{NaO}_5^+$   $[\text{M}+\text{Na}]^+$ : 319.0577, found: 319.0578.

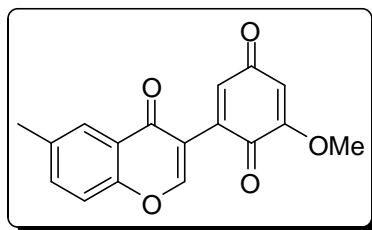

**2-methoxy-6-(6-methyl-4-oxo-4H-chromen-3-yl)cyclohexa-2,5-diene-1,4-dione (3l).** Yellow solid; mp 240–242 °C;  $^1\text{H}$  NMR (400 MHz, Dimethyl sulfoxide- $d_6$ )  $\delta$  8.47 (s, 1H), 7.87 (d,  $J = 2.2$  Hz, 1H), 7.68 (dd,  $J = 8.6, 2.2$  Hz, 1H), 7.61 (d,  $J = 8.6$  Hz, 1H), 6.98 (d,  $J = 2.4$  Hz, 1H), 6.19 (d,  $J = 2.4$  Hz, 1H), 3.83 (s, 3H), 2.44 (s, 3H);  $^{13}\text{C}$  NMR (100 MHz,  $\text{DMSO}-d_6$ )  $\delta$  187.0, 179.4, 178.7, 174.1, 158.9, 156.7, 153.7, 137.4, 135.7, 135.2, 124.5, 123.0, 118.3, 117.2, 107.4, 56.6, 20.4; HRMS ( $\text{EI}^+$ )  $m/z$  calcd. for  $\text{C}_{17}\text{H}_{12}\text{NaO}_5^+$   $[\text{M}+\text{Na}]^+$ : 319.0577, found: 319.0578.

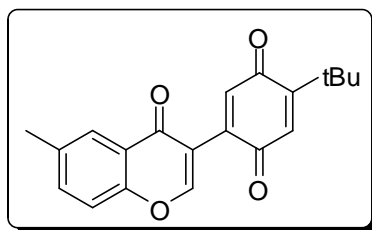

**2-tert-butyl-5-(6-methyl-4-oxo-4H-chromen-3-yl)cyclohexa-2,5-diene-1,4-dione (3m).** Overall yield 92% (25.8 mg) as yellow oil;  $^1\text{H}$  NMR (300 MHz, Chloroform- $d$ )  $\delta$  8.23 (s, 1H), 8.02 (s, 1H), 7.50 (dd,  $J = 8.5, 2.2$  Hz, 1H), 7.37 (d,  $J = 8.6$  Hz, 1H), 7.28 (s, 1H), 6.66 (s, 1H), 2.45 (s, 3H), 1.29 (s, 9H);  $^{13}\text{C}$  NMR (100 MHz,  $\text{CDCl}_3$ )  $\delta$  187.4, 187.0, 175.2, 157.0, 156.1, 153.9, 137.7, 135.9, 135.4, 135.4, 131.9, 125.7, 123.8, 117.9, 115.7, 35.2, 29.1, 21.0; HRMS ( $\text{EI}^+$ )  $m/z$  calcd. for  $\text{C}_{20}\text{H}_{18}\text{NaO}_4^+$   $[\text{M}+\text{Na}]^+$ : 345.1097, found: 345.1092.



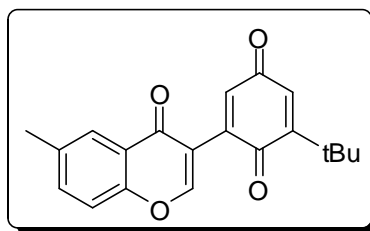

**2-tert-butyl-6-(6-methyl-4-oxo-4H-chromen-3-yl)cyclohexa-2,5-diene-1,4-dione (3m, major).** Yellow oil;  $^1\text{H}$  NMR (300 MHz, Chloroform- $d$ )  $\delta$  8.06 (s, 1H), 8.01 (s, 1H), 7.50 (dd,  $J = 8.7, 2.1$  Hz, 1H), 7.37 (d,  $J = 8.6$  Hz, 1H), 7.03 (d,  $J = 2.6$  Hz, 1H), 6.63 (d,  $J = 2.7$  Hz, 1H), 2.45 (s, 3H), 1.30 (s, 9H);  $^{13}\text{C}$  NMR (100 MHz,  $\text{CDCl}_3$ )  $\delta$  187.9, 185.7, 175.2, 156.6, 155.7, 154.2, 140.1, 135.9, 135.4, 134.1, 131.5, 125.7, 123.8, 118.0, 117.9, 35.6, 29.3, 21.0; HRMS ( $\text{EI}^+$ )  $m/z$  calcd. for  $\text{C}_{20}\text{H}_{18}\text{NaO}_4^+$   $[\text{M}+\text{Na}]^+$ : 345.1097, found: 345.1092.

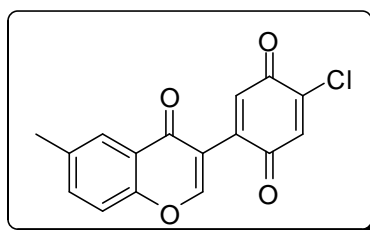

**2-chloro-5-(6-methyl-4-oxo-4H-chromen-3-yl)cyclohexa-2,5-diene-1,4-dione (3n, major).** Overall yield 69% (17.3 mg) as yellow solid; mp 175–177 °C;  $^1\text{H}$  NMR (400 MHz, Chloroform- $d$ )  $\delta$  8.24 (s, 1H), 8.01 (dd,  $J = 2.2, 1.0$  Hz, 1H), 7.57 (s, 1H), 7.54 – 7.48 (m, 1H), 7.38 (d,  $J = 8.5$  Hz, 1H), 7.07 (s, 1H), 2.46 (s, 3H);  $^{13}\text{C}$  NMR (100 MHz,  $\text{CDCl}_3$ )  $\delta$  183.9, 179.4, 174.8, 157.6, 153.8, 144.0, 137.3, 136.2, 135.6, 135.0, 133.9, 125.7, 123.7, 117.9, 115.3, 21.0; HRMS ( $\text{EI}^+$ )  $m/z$  calcd. for  $\text{C}_{16}\text{H}_9\text{ClNaO}_4^+$   $[\text{M}+\text{Na}]^+$ : 323.0082, found: 323.0085.

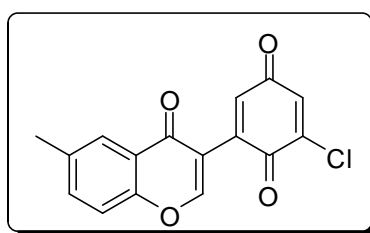

**2-chloro-6-(6-methyl-4-oxo-4H-chromen-3-yl)cyclohexa-2,5-diene-1,4-dione (3n).** Yellow solid; mp 216–218 °C;  $^1\text{H}$  NMR (400 MHz, Chloroform- $d$ )  $\delta$  8.22 (s, 1H), 8.01 (dd,  $J = 1.5, 0.7$  Hz, 1H), 7.52 (ddd,  $J = 8.6, 2.2, 0.6$  Hz, 1H), 7.39 (d,  $J = 8.6$  Hz, 1H), 7.36 (d,  $J = 2.5$  Hz, 1H), 7.04 (d,  $J = 2.5$  Hz, 1H), 2.46 (s, 3H);  $^{13}\text{C}$  NMR (100 MHz,  $\text{CDCl}_3$ )  $\delta$  184.7, 178.5, 174.7, 157.0, 153.9, 144.2, 137.2, 136.2, 135.8, 135.6, 133.6, 125.7, 123.7, 117.9, 116.1, 21.0; HRMS ( $\text{EI}^+$ )  $m/z$  calcd. for  $\text{C}_{16}\text{H}_9\text{ClNaO}_4^+$   $[\text{M}+\text{Na}]^+$ : 323.0082, found: 323.0085.

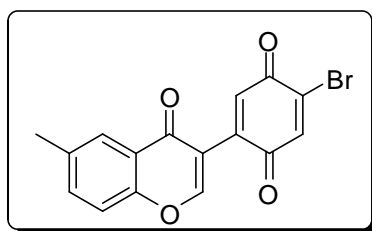

**2-chloro-5-(6-methyl-4-oxo-4H-chromen-3-yl)cyclohexa-2,5-diene-1,4-dione (3o, major).** Overall yield 55% (16.6 mg) as yellow solid; mp 152–154 °C;  $^1\text{H}$  NMR (300 MHz, Chloroform- $d$ )  $\delta$  8.24 (s, 1H), 8.01 (d,  $J = 2.1$  Hz, 1H), 7.61 (s, 1H), 7.51 (dd,  $J = 8.6, 2.3$  Hz, 1H), 7.38 (d,  $J = 11.0$  Hz, 2H), 2.46 (s, 3H);  $^{13}\text{C}$  NMR (100 MHz,  $\text{CDCl}_3$ )  $\delta$  183.5, 179.4, 174.8, 157.5, 153.8, 138.3, 137.4, 137.2, 136.2, 135.6, 134.8, 125.7, 123.7, 117.9, 115.4, 21.0; HRMS ( $\text{EI}^+$ )  $m/z$  calcd. for  $\text{C}_{16}\text{H}_9\text{BrNaO}_4^+$   $[\text{M}+\text{Na}]^+$ : 366.9576, found: 366.9571.

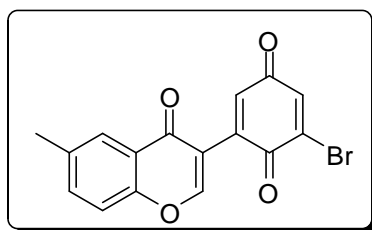

**2-bromo-6-(6-methyl-4-oxo-4H-chromen-3-yl)cyclohexa-2,5-diene-1,4-dione (3o).** Yellow solid; mp 202–204 °C;  $^1\text{H}$  NMR (400 MHz, Chloroform- $d$ )  $\delta$  8.21 (s, 1H), 8.02 (d,  $J = 1.6$  Hz, 1H), 7.52 (dd,  $J = 8.5, 2.2$  Hz, 1H), 7.39 (d,  $J = 8.5$  Hz, 1H), 7.37 (d,  $J = 2.5$  Hz, 1H), 7.33 (d,  $J = 2.5$  Hz, 1H), 2.46 (s, 3H);  $^{13}\text{C}$  NMR (100 MHz,  $\text{CDCl}_3$ )  $\delta$  184.5, 178.4, 174.7, 157.0, 153.9, 138.1, 137.5, 136.9, 136.2, 135.7, 135.6,

125.7, 123.7, 117.9, 116.3, 21.0; HRMS (EI<sup>+</sup>) m/z calcd. for C<sub>16</sub>H<sub>9</sub>BrNaO<sub>4</sub><sup>+</sup> [M+Na]<sup>+</sup>: 366.9576, found: 366.9571.

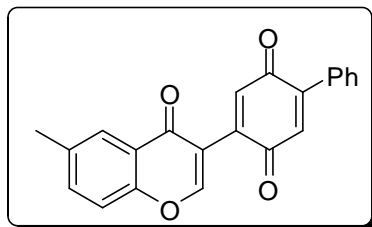

**2-(6-methyl-4-oxo-4H-chromen-3-yl)-5-phenylcyclohexa-2,5-diene-1,4-dione (3p, major).** Overall Yield 71% (21.1 mg) as yellow solid; mp 223–225 °C; <sup>1</sup>H NMR (400 MHz, Methylene chloride-d<sub>2</sub>) δ 8.31 (s, 1H), 8.02 (dd, *J* = 1.6, 0.8 Hz, 1H), 7.61 – 7.50 (m, 3H), 7.52 – 7.44 (m, 3H), 7.47 – 7.39 (m, 2H), 6.95 (s, 1H), 2.48 (s, 3H); <sup>13</sup>C NMR (100 MHz, CD<sub>2</sub>Cl<sub>2</sub>) δ 187.1, 186.5, 175.3, 157.6, 154.4, 146.0, 137.5, 136.5, 136.2, 135.8, 133.4, 133.1, 130.4, 129.7, 128.8, 125.8, 124.2, 118.3, 116.3, 21.1; HRMS (EI<sup>+</sup>) m/z calcd. for C<sub>22</sub>H<sub>14</sub>NaO<sub>4</sub><sup>+</sup> [M+Na]<sup>+</sup>: 365.0784, found: 365.0782.

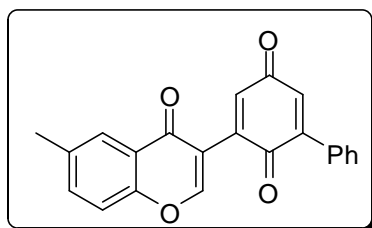

**2-(6-methyl-4-oxo-4H-chromen-3-yl)-6-phenylcyclohexa-2,5-diene-1,4-dione (3p).** Yellow solid: mp 195–197 °C; <sup>1</sup>H NMR (300 MHz, Chloroform-d) δ 8.16 (s, 1H), 8.03 (d, *J* = 1.5 Hz, 1H), 7.55 – 7.36 (m, 7H), 7.25 (d, *J* = 2.7 Hz, 1H), 6.89 (d, *J* = 2.7 Hz, 1H), 2.46 (s, 3H); <sup>13</sup>C NMR (100 MHz, CDCl<sub>3</sub>) δ 187.2, 185.2, 175.2, 156.2, 154.1, 146.7, 138.5, 136.0, 135.4, 135.2, 133.1, 132.4, 130.1, 129.3, 128.5, 125.7, 123.8, 117.9, 117.4, 21.0; HRMS (EI<sup>+</sup>) m/z calcd. for C<sub>22</sub>H<sub>14</sub>NaO<sub>4</sub><sup>+</sup> [M+Na]<sup>+</sup>: 365.0784, found: 365.0782.

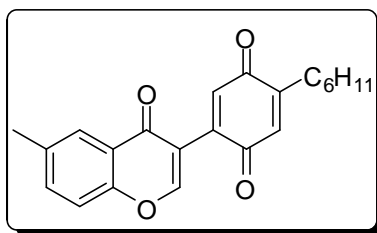

**2-cyclohexyl-5-(6-methyl-4-oxo-4H-chromen-3-yl)cyclohexa-2,5-diene-1,4-dione (3q).** Overall yield 88% (26.8 mg) as yellow oil;  $^1\text{H}$  NMR (400 MHz, Chloroform- $d$ )  $\delta$  8.21 (s, 1H), 8.01 (dd,  $J = 2.2, 1.0$  Hz, 1H), 7.49 (ddd,  $J = 8.5, 2.2, 0.6$  Hz, 1H), 7.37 (d,  $J = 8.6$  Hz, 1H), 7.33 (s, 1H), 6.56 (d,  $J = 1.1$  Hz, 1H), 2.78 – 2.65 (m, 1H), 2.45 (s, 3H), 1.86 – 1.68 (m, 5H), 1.47 – 1.31 (m, 2H), 1.28 – 1.08 (m, 3H);  $^{13}\text{C}$  NMR (100 MHz,  $\text{CDCl}_3$ )  $\delta$  187.1, 186.8, 175.2, 157.1, 154.0, 153.9, 136.3, 136.2, 135.9, 135.4, 131.1, 125.7, 123.8, 117.9, 116.0, 36.2, 32.0, 26.3, 26.0, 21.0; HRMS ( $\text{EI}^+$ )  $m/z$  calcd. for  $\text{C}_{22}\text{H}_{20}\text{NaO}_4^+$   $[\text{M}+\text{Na}]^+$ : 371.1254, found: 371.1238.

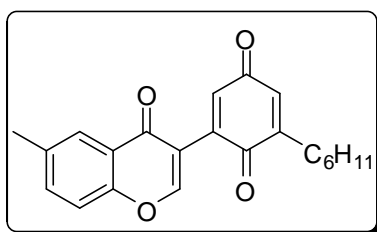

**2-cyclohexyl-6-(6-methyl-4-oxo-4H-chromen-3-yl)cyclohexa-2,5-diene-1,4-dione (3q, major).** Yellow oil;  $^1\text{H}$  NMR (400 MHz, Chloroform- $d$ )  $\delta$  8.11 (s, 1H), 8.01 (dd,  $J = 2.1, 0.9$  Hz, 1H), 7.50 (dd,  $J = 8.5, 2.1$  Hz, 1H), 7.37 (d,  $J = 8.6$  Hz, 1H), 7.12 (d,  $J = 2.6$  Hz, 1H), 6.53 (dd,  $J = 2.7, 1.2$  Hz, 1H), 2.83 – 2.69 (m, 1H), 2.45 (s, 3H), 1.89 – 1.67 (m, 5H), 1.47 – 1.31 (m, 2H), 1.28 – 1.10 (m, 3H);  $^{13}\text{C}$  NMR (100 MHz,  $\text{CDCl}_3$ )  $\delta$  187.8, 185.5, 175.2, 156.1, 154.4, 154.1, 138.4, 135.9, 135.4, 135.0, 130.6, 125.7, 123.8, 117.9, 117.5, 36.9, 32.2, 26.3, 26.0, 21.0; HRMS ( $\text{EI}^+$ )  $m/z$  calcd. for  $\text{C}_{22}\text{H}_{20}\text{NaO}_4^+$   $[\text{M}+\text{Na}]^+$ : 371.1254, found: 371.1238.

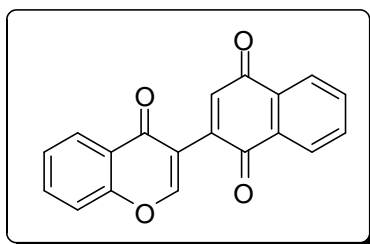

**2-(4-oxo-4H-chromen-3-yl)naphthalene-1,4-dione (3r).** Yield 76% (20.3 mg) as yellow solid; mp 266–268 °C;  $^1\text{H}$  NMR (300 MHz, Chloroform-d)  $\delta$  8.31 (s, 1H), 8.27 (d,  $J$  = 8.1 Hz, 1H), 8.19 – 8.07 (m, 2H), 7.81 – 7.73 (m, 2H), 7.70 (d,  $J$  = 7.1 Hz, 1H), 7.55 – 7.40 (m, 3H);  $^{13}\text{C}$  NMR (100 MHz,  $\text{CDCl}_3$ )  $\delta$  184.7, 183.7, 175.1, 156.9, 155.8, 139.3, 138.1, 134.2, 134.0, 133.8, 132.2, 132.0, 127.1, 126.5, 126.1, 125.8, 124.2, 118.2, 117.2; HRMS ( $\text{EI}^+$ )  $m/z$  calcd. for  $\text{C}_{19}\text{H}_{10}\text{NaO}_4^+$  [ $\text{M}+\text{Na}$ ] $^+$ : 325.0471, found: 325.0465.

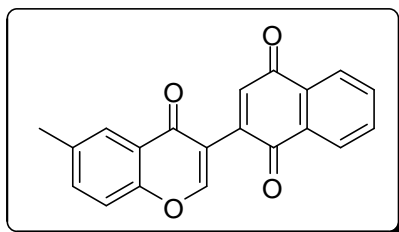

**2-(6-methyl-4-oxo-4H-chromen-3-yl)naphthalene-1,4-dione (3s).** Yield 87% (24 mg) as yellow solid; mp 234–236 °C;  $^1\text{H}$  NMR (300 MHz, Chloroform-d)  $\delta$  8.28 (s, 1H), 8.15 – 8.08 (m, 2H), 8.04 (s, 1H), 7.80 – 7.70 (m, 2H), 7.56 – 7.45 (m, 2H), 7.40 (d,  $J$  = 8.5 Hz, 1H), 2.46 (s, 3H);  $^{13}\text{C}$  NMR (100 MHz,  $\text{CDCl}_3$ )  $\delta$  184.8, 183.8, 175.2, 156.8, 154.0, 139.5, 138.0, 135.9, 135.4, 134.0, 133.8, 132.2, 132.0, 127.1, 126.1, 125.7, 123.9, 117.9, 117.0, 21.0; HRMS ( $\text{EI}^+$ )  $m/z$  calcd. for  $\text{C}_{20}\text{H}_{12}\text{NaO}_4^+$  [ $\text{M}+\text{Na}$ ] $^+$ : 339.0628, found: 339.0617.

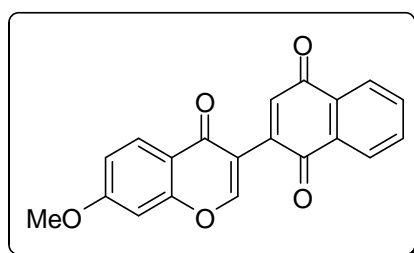

**2-(7-methoxy-4-oxo-4H-chromen-3-yl)naphthalene-1,4-dione (3t).** Yield 56% (16.5 mg) as yellow solid; mp 233–235 °C;  $^1\text{H}$  NMR (400 MHz, Chloroform-d)  $\delta$  8.23 (s, 1H), 8.16 (d,  $J$  = 9.0 Hz, 1H), 8.14 – 8.07 (m, 2H), 7.78 – 7.71 (m, 2H), 7.48 (s, 1H), 7.00 (dd,  $J$  = 8.9, 2.4 Hz, 1H), 6.87 (d,  $J$  = 2.4 Hz, 1H), 3.91 (s, 3H);  $^{13}\text{C}$  NMR (100 MHz,  $\text{CDCl}_3$ )  $\delta$  184.7, 183.8, 174.4, 164.4, 157.5, 156.4, 139.5, 138.0, 133.9,

133.8, 132.2, 132.0, 127.9, 127.0, 126.1, 118.1, 117.1, 115.1, 100.3, 55.9; HRMS (EI<sup>+</sup>) m/z calcd. for C<sub>20</sub>H<sub>12</sub>NaO<sub>5</sub><sup>+</sup> [M+Na]<sup>+</sup>: 355.0577, found: 355.0572.

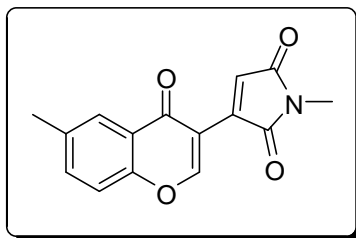

**1-methyl-3-(6-methyl-4-oxo-4H-chromen-3-yl)-1H-pyrrole-2,5-dione (3u).** Yield 52% (12.1 mg) as white solid; mp 256–258 °C; <sup>1</sup>H NMR (300 MHz, Chloroform-d) δ 9.34 (s, 1H), 8.03 (d, *J* = 1.2 Hz, 1H), 7.78 (s, 1H), 7.52 (dd, *J* = 8.6, 2.2 Hz, 1H), 7.40 (d, *J* = 8.5 Hz, 1H), 3.05 (s, 3H), 2.46 (s, 3H); <sup>13</sup>C NMR (100 MHz, CDCl<sub>3</sub>) δ 175.4, 171.5, 171.2, 158.9, 153.6, 136.3, 135.6, 134.9, 127.9, 125.5, 123.6, 118.0, 114.2, 23.8, 21.0; HRMS (EI<sup>+</sup>) m/z calcd. for C<sub>15</sub>H<sub>11</sub>NNaO<sub>4</sub><sup>+</sup> [M+Na]<sup>+</sup>: 292.0580, found: 292.0582.

## *Appendix I*

### **Spectral Copies of $^1\text{H}$ and $^{13}\text{C}$ NMR Data Obtained in this Study**

2-(6-methyl-4-oxo-4H-chromen-3-yl)cyclohexa-2,5-diene-1,4-dione (3a)

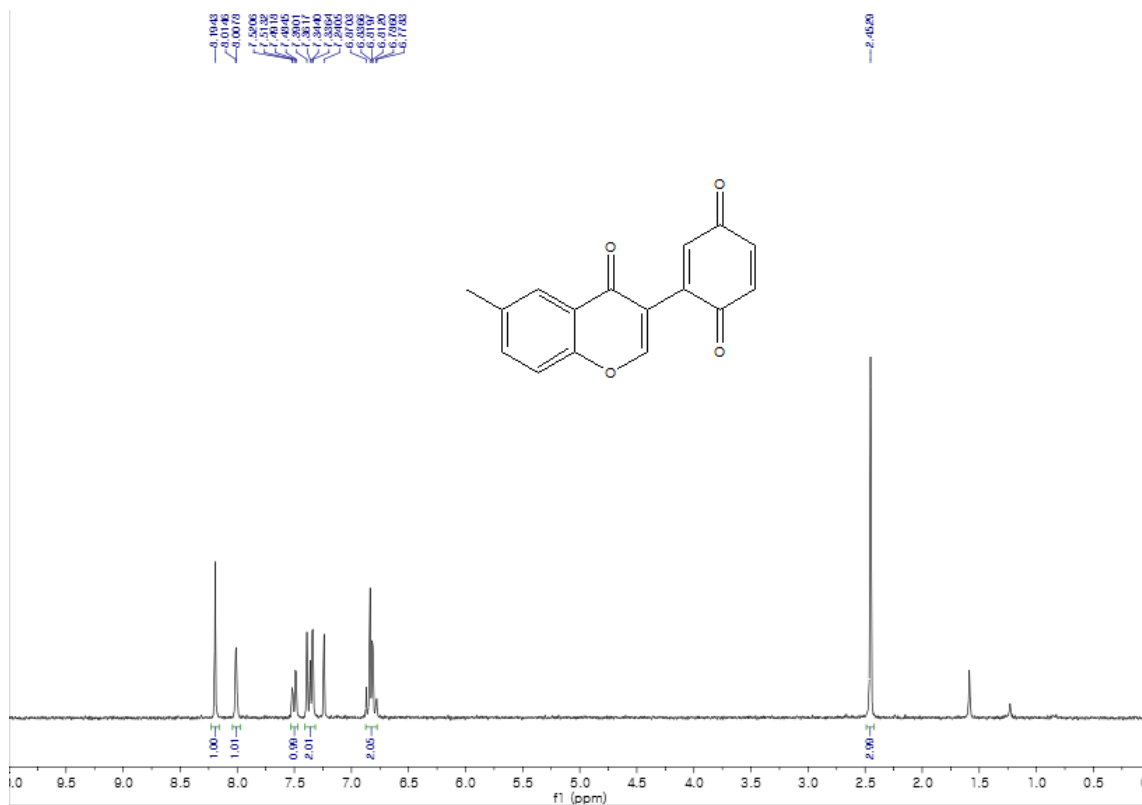

300 MHz,  $^1\text{H}$  NMR in  $\text{CDCl}_3$

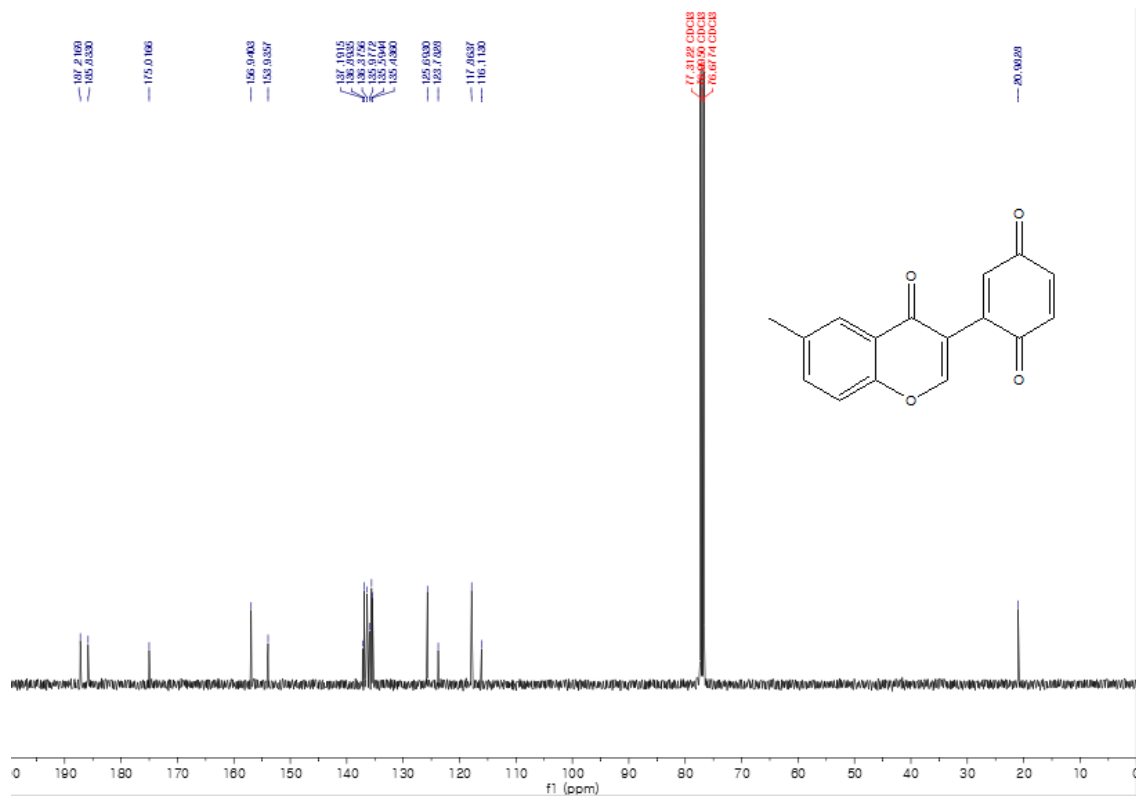

100 MHz,  $^{13}\text{C}$  NMR in  $\text{CDCl}_3$





2-(6-nitro-4-oxo-4H-chromen-3-yl)cyclohexa-2,5-diene-1,4-dione (3c)

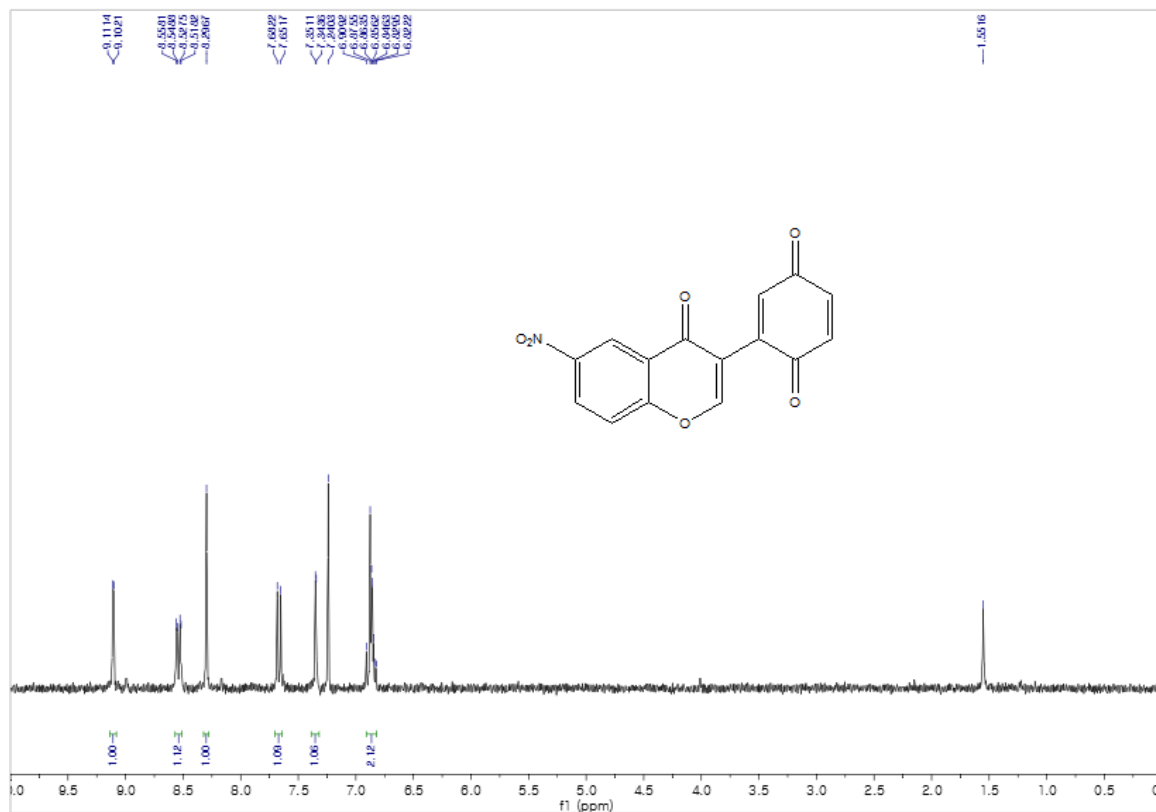

300 MHz,  $^1\text{H}$  NMR in  $\text{CDCl}_3$

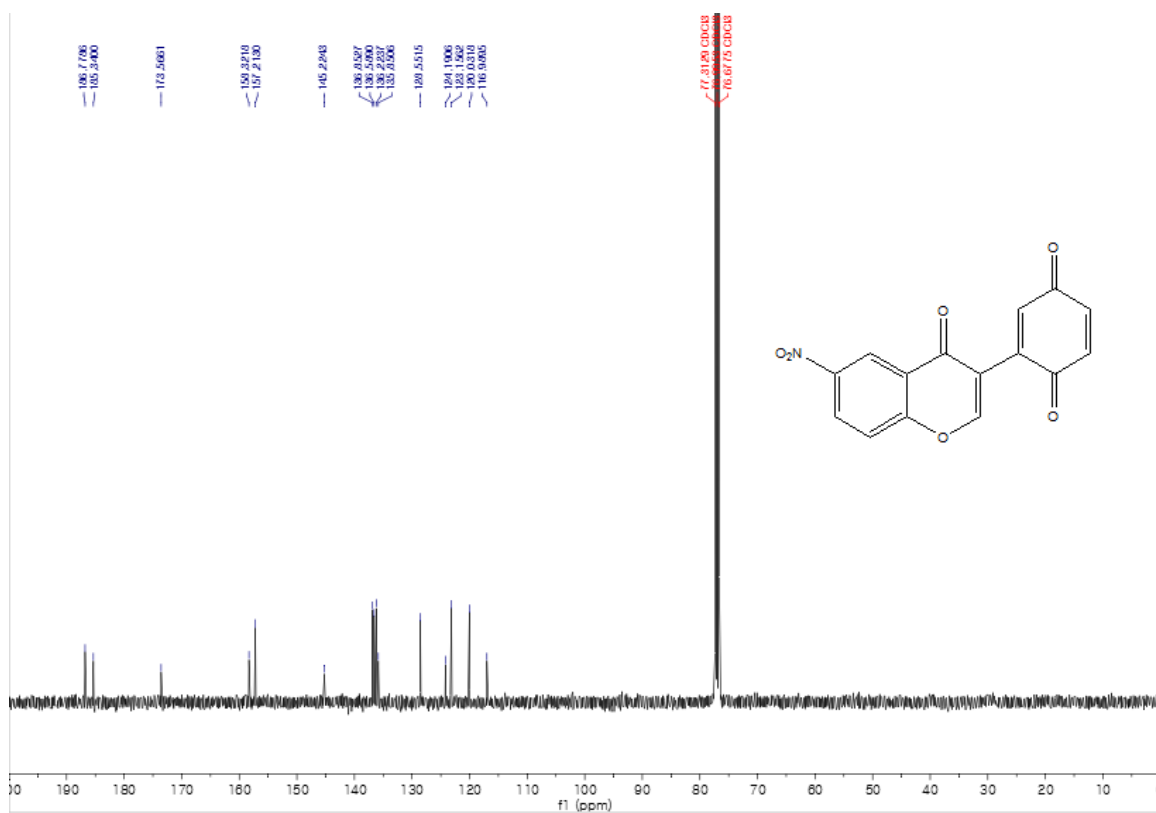

100 MHz,  $^{13}\text{C}$  NMR in  $\text{CDCl}_3$

2-(6-fluoro-4-oxo-4H-chromen-3-yl)cyclohexa-2,5-diene-1,4-dione (3d)

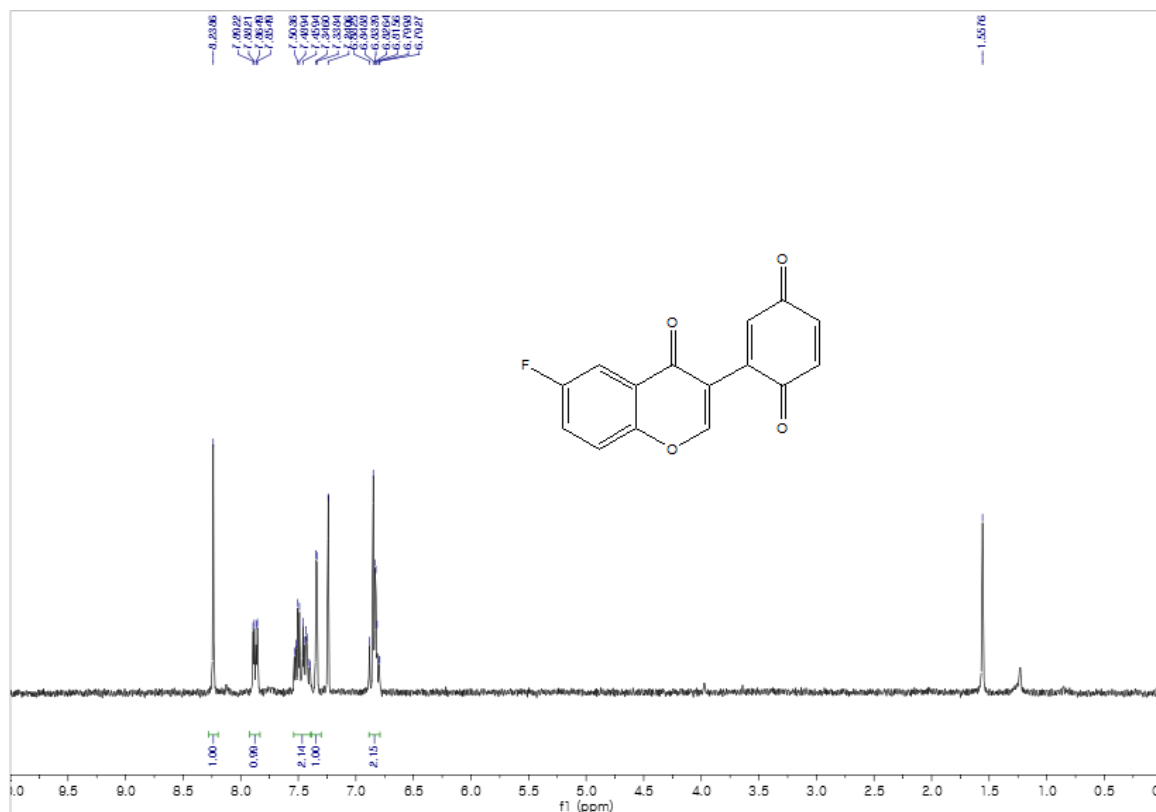

300 MHz,  $^1\text{H}$  NMR in  $\text{CDCl}_3$

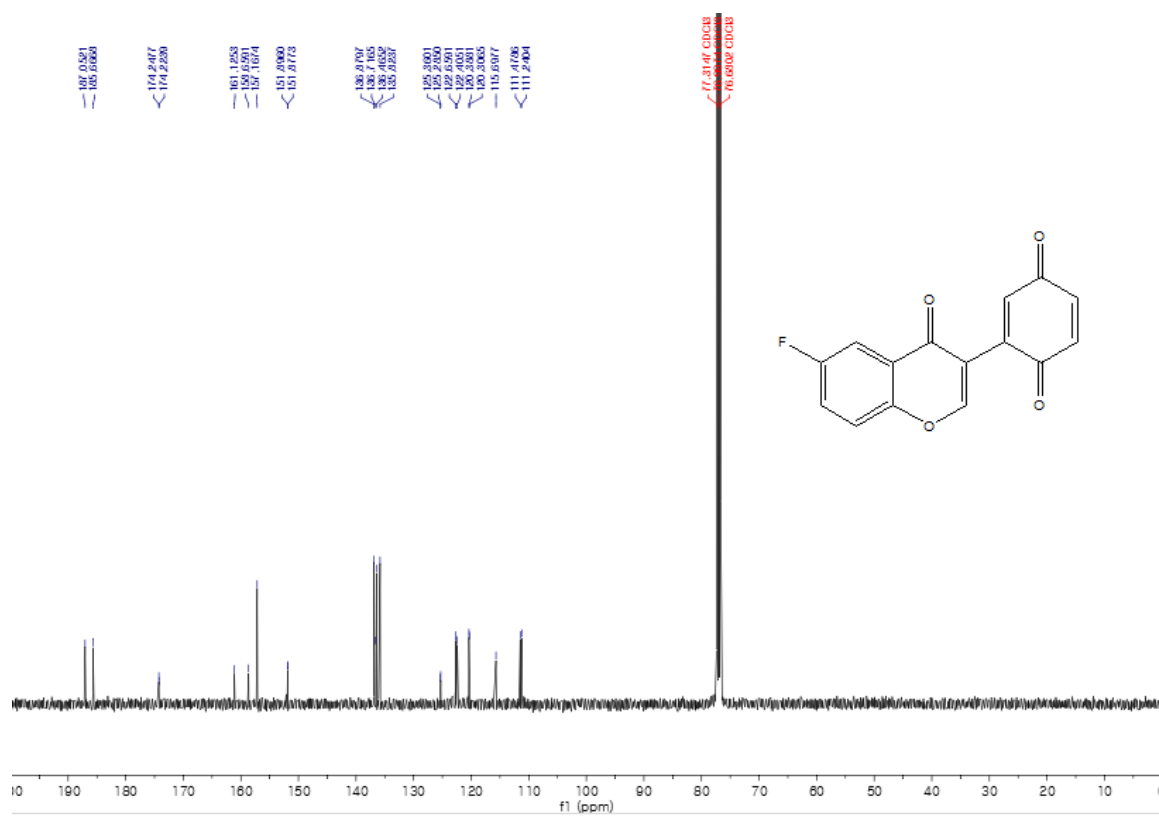

100 MHz,  $^{13}\text{C}$  NMR in  $\text{CDCl}_3$

2-(6-chloro-4-oxo-4H-chromen-3-yl)cyclohexa-2,5-diene-1,4-dione (3e)

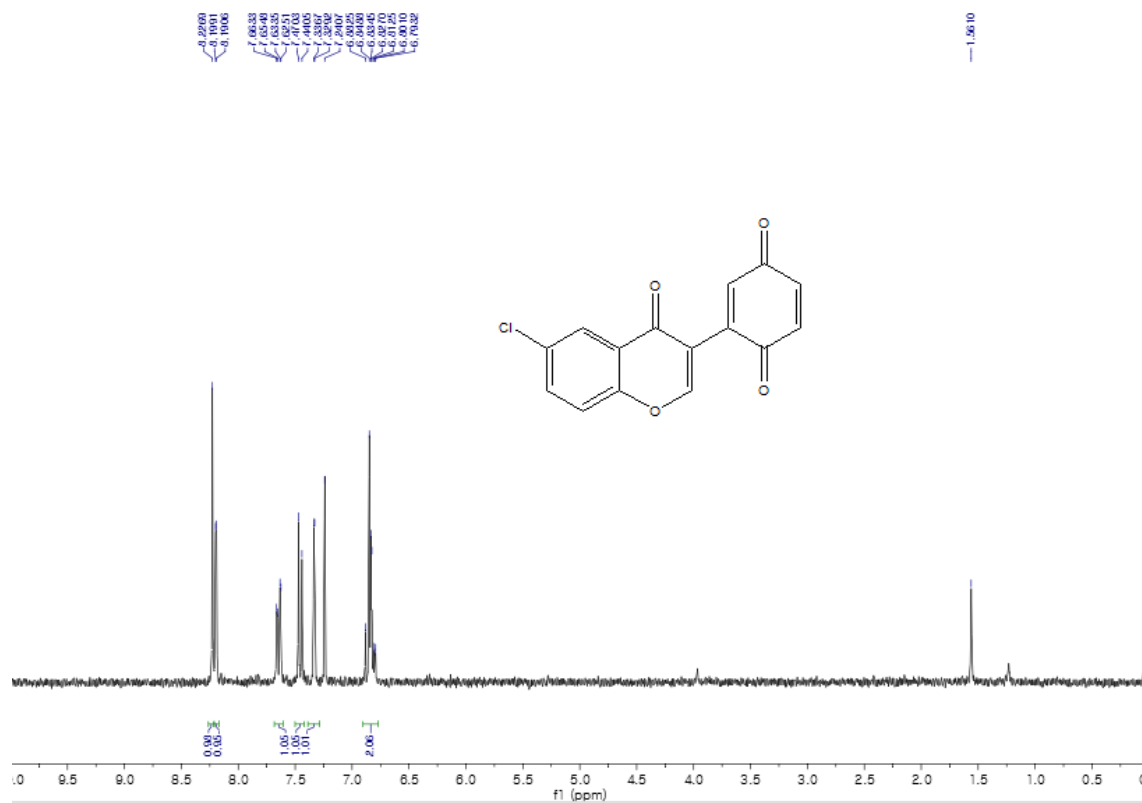

300 MHz,  $^1\text{H}$  NMR in  $\text{CDCl}_3$

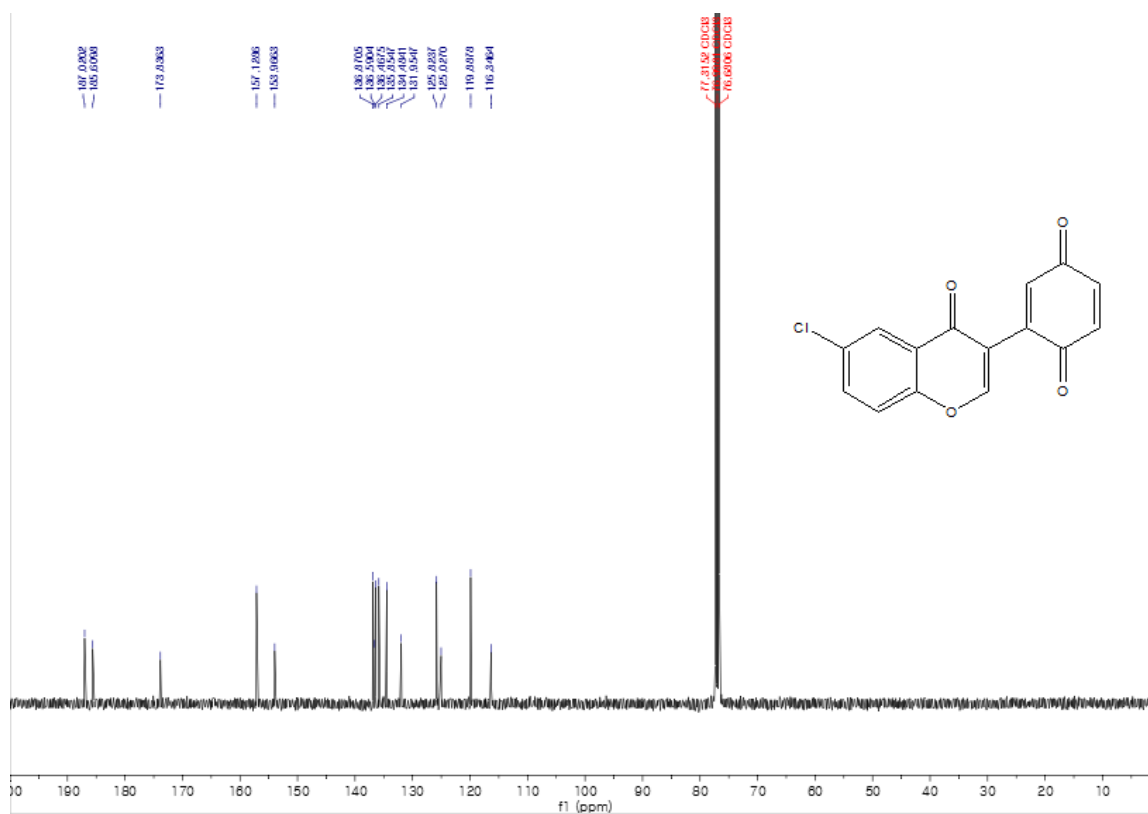

100 MHz,  $^{13}\text{C}$  NMR in  $\text{CDCl}_3$

2-(6-bromo-4-oxo-4H-chromen-3-yl)cyclohexa-2,5-diene-1,4-dione (3f)

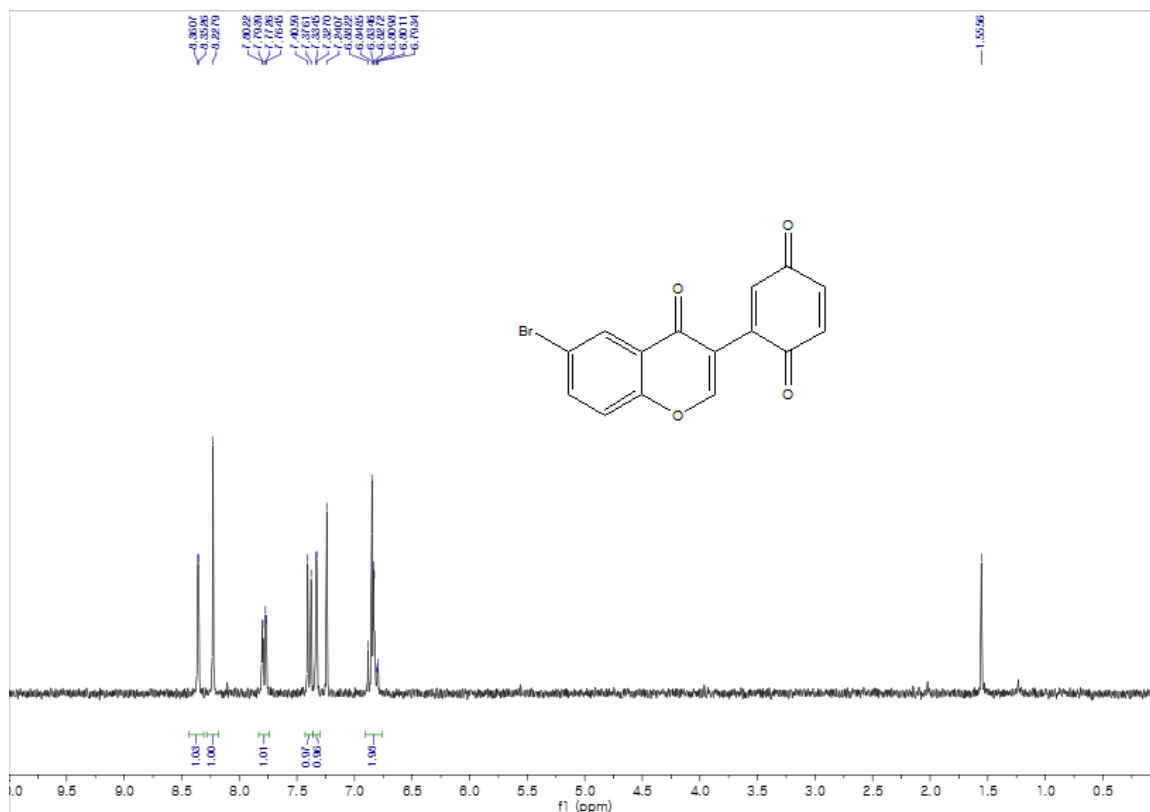

300 MHz, <sup>1</sup>H NMR in CDCl<sub>3</sub>

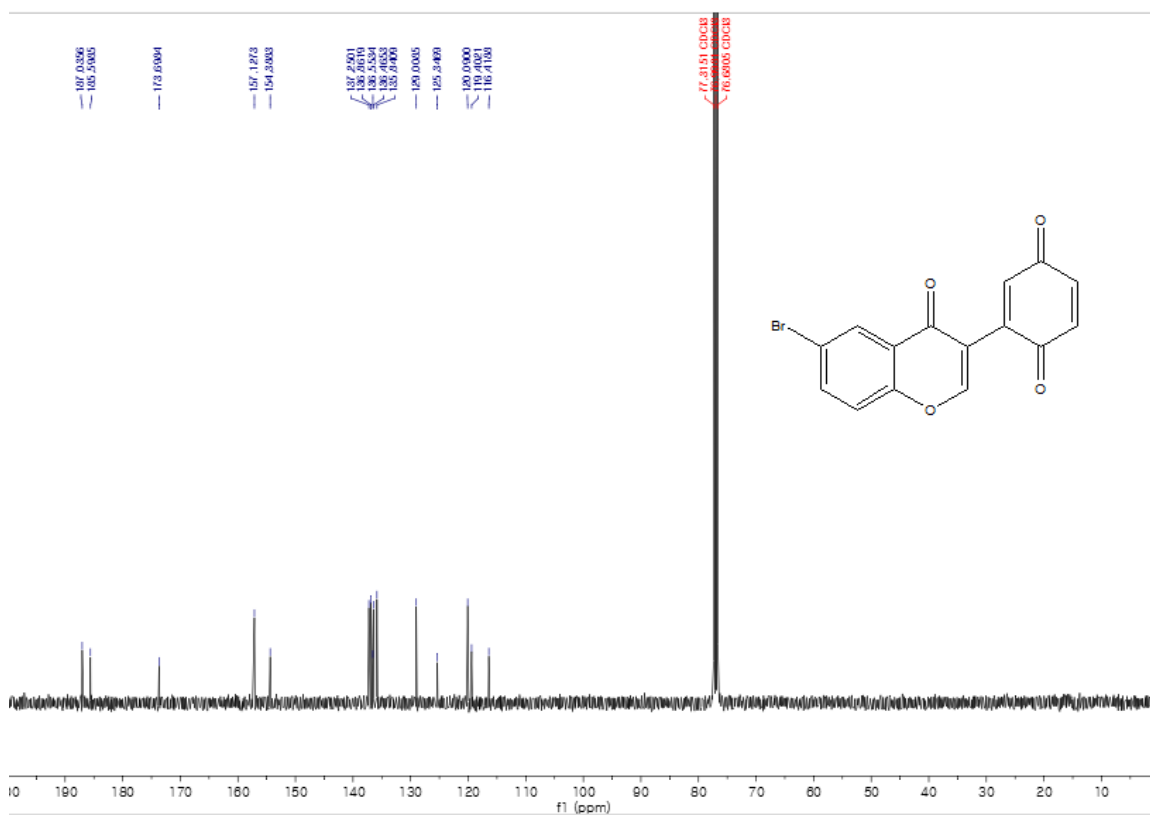

100 MHz, <sup>13</sup>C NMR in CDCl<sub>3</sub>

2-(7-methoxy-4-oxo-4H-chromen-3-yl)cyclohexa-2,5-diene-1,4-dione (3g)

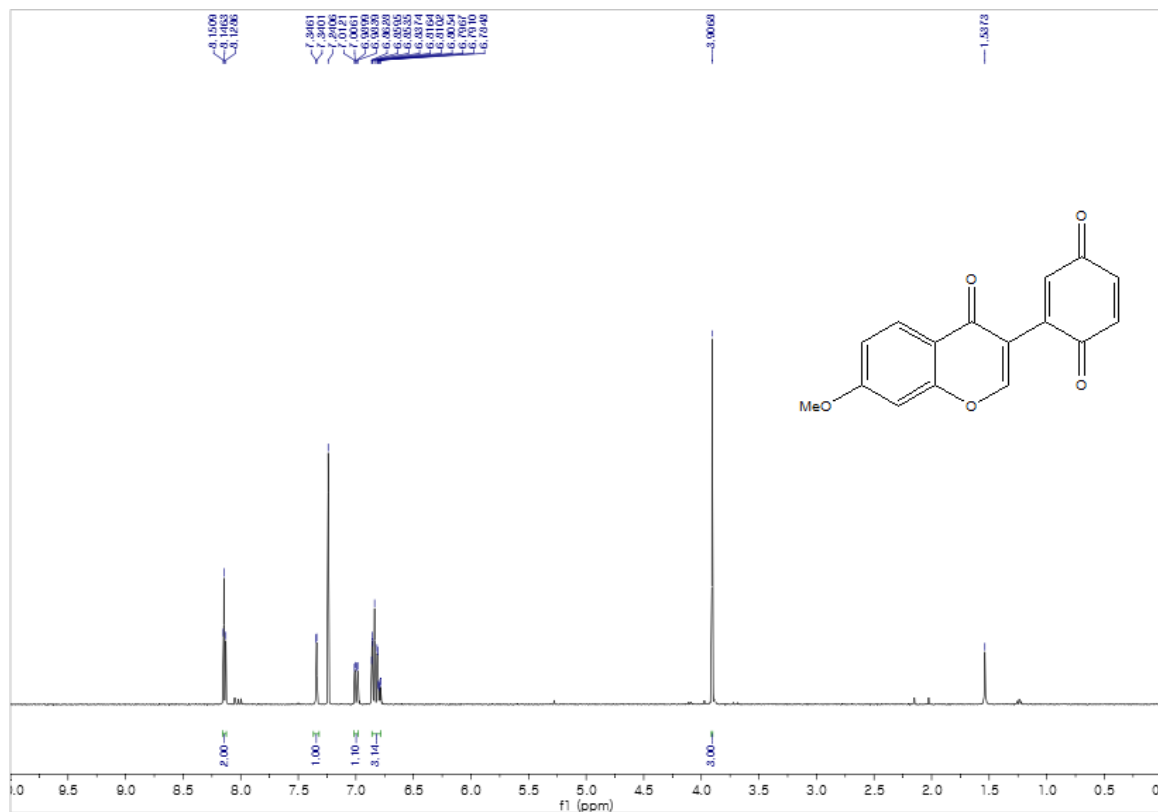

400 MHz,  $^1\text{H}$  NMR in  $\text{CDCl}_3$

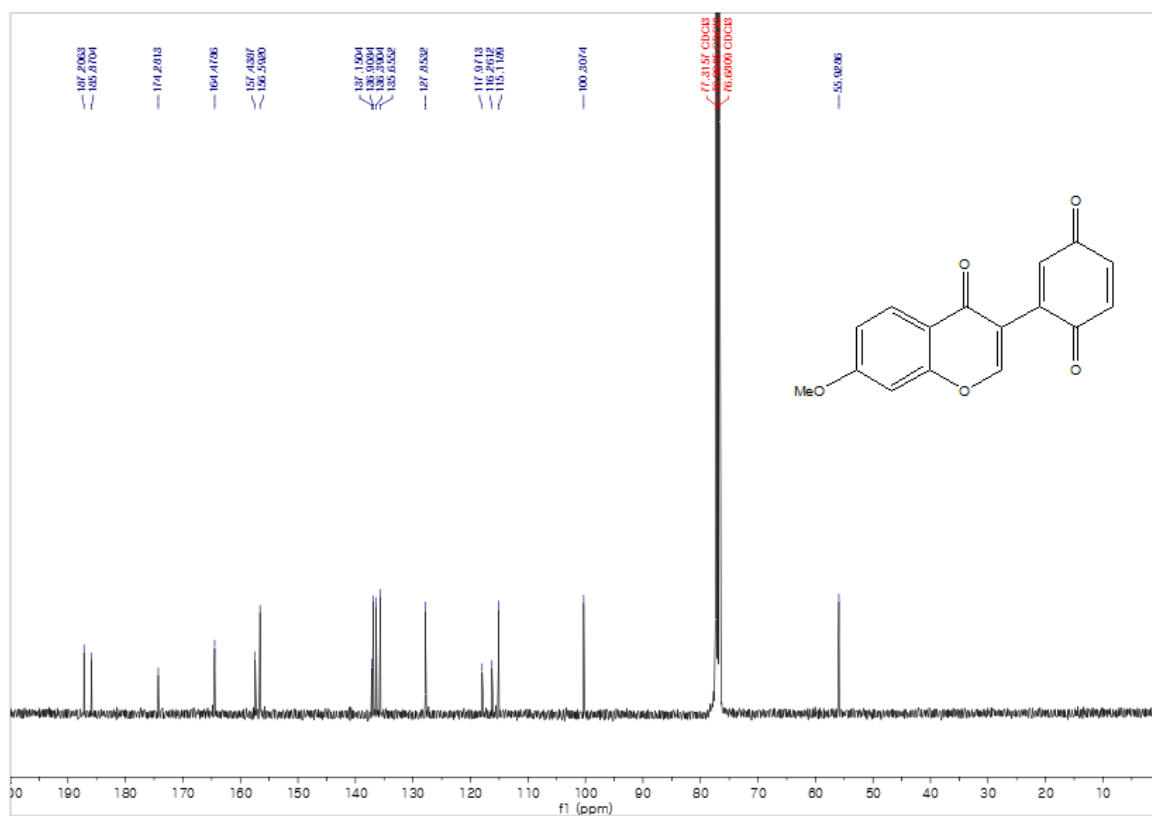

100 MHz,  $^{13}\text{C}$  NMR in  $\text{CDCl}_3$

3-(3,6-dioxocyclohexa-1,4-dienyl)-4-oxo-4H-chromen-7-yl acetate (3h)

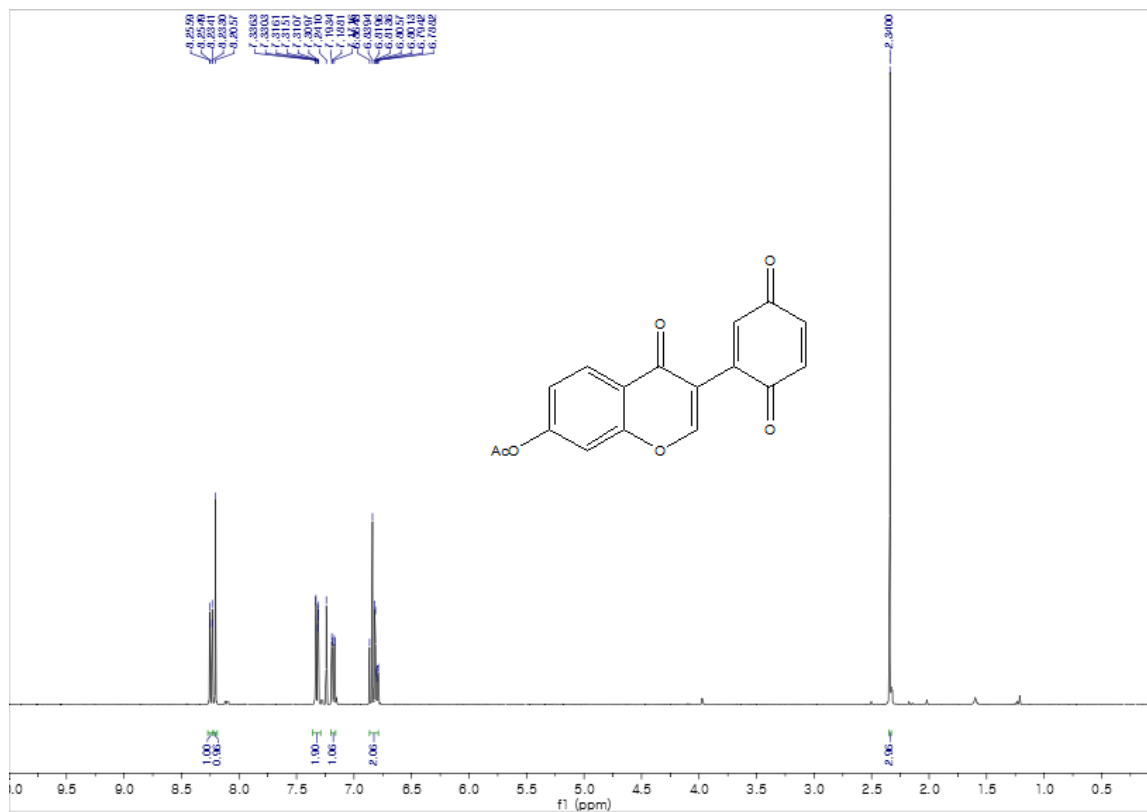

400 MHz,  $^1\text{H}$  NMR in  $\text{CDCl}_3$

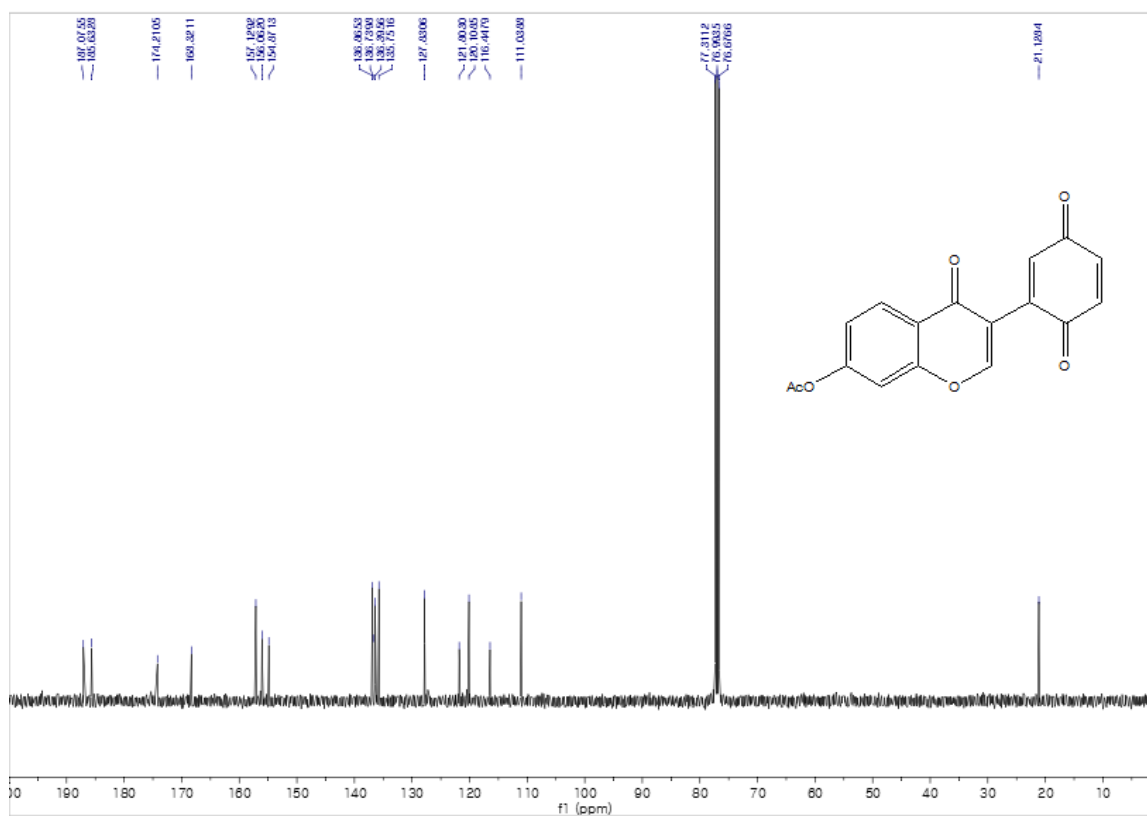

100 MHz,  $^{13}\text{C}$  NMR in  $\text{CDCl}_3$

3-(3,6-dioxocyclohexa-1,4-dienyl)-4-oxo-4H-chromen-7-yl trifluoromethanesulfonate (3i)

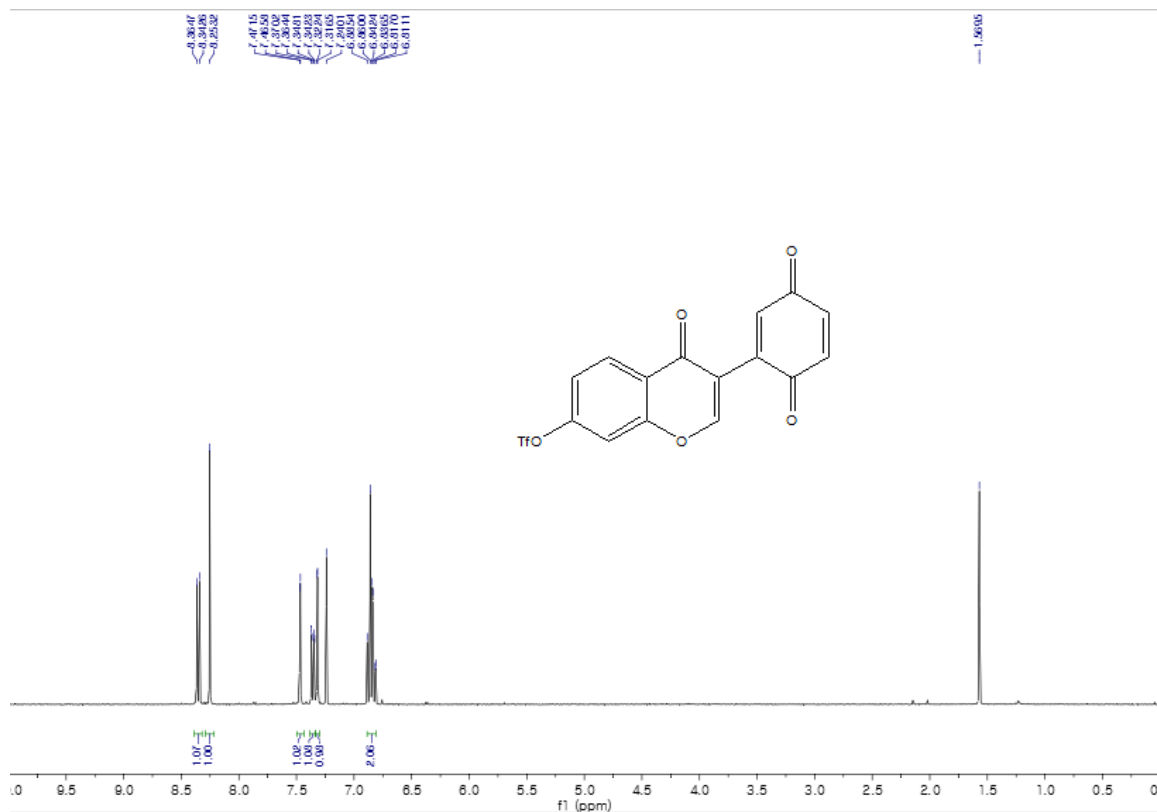

400 MHz,  $^1\text{H}$  NMR in  $\text{CDCl}_3$

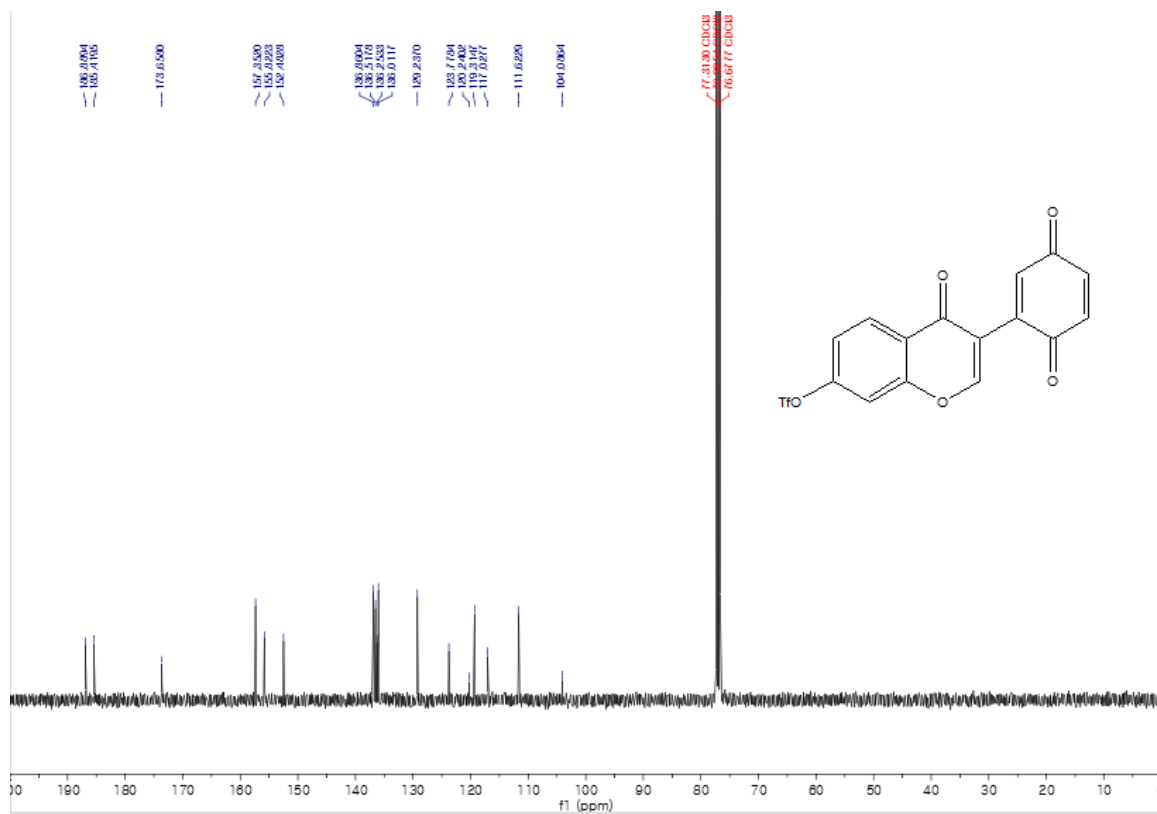

100 MHz,  $^{13}\text{C}$  NMR in  $\text{CDCl}_3$



2-(7-hydroxy-4-oxo-4H-chromen-3-yl)cyclohexa-2,5-diene-1,4-dione (3j)

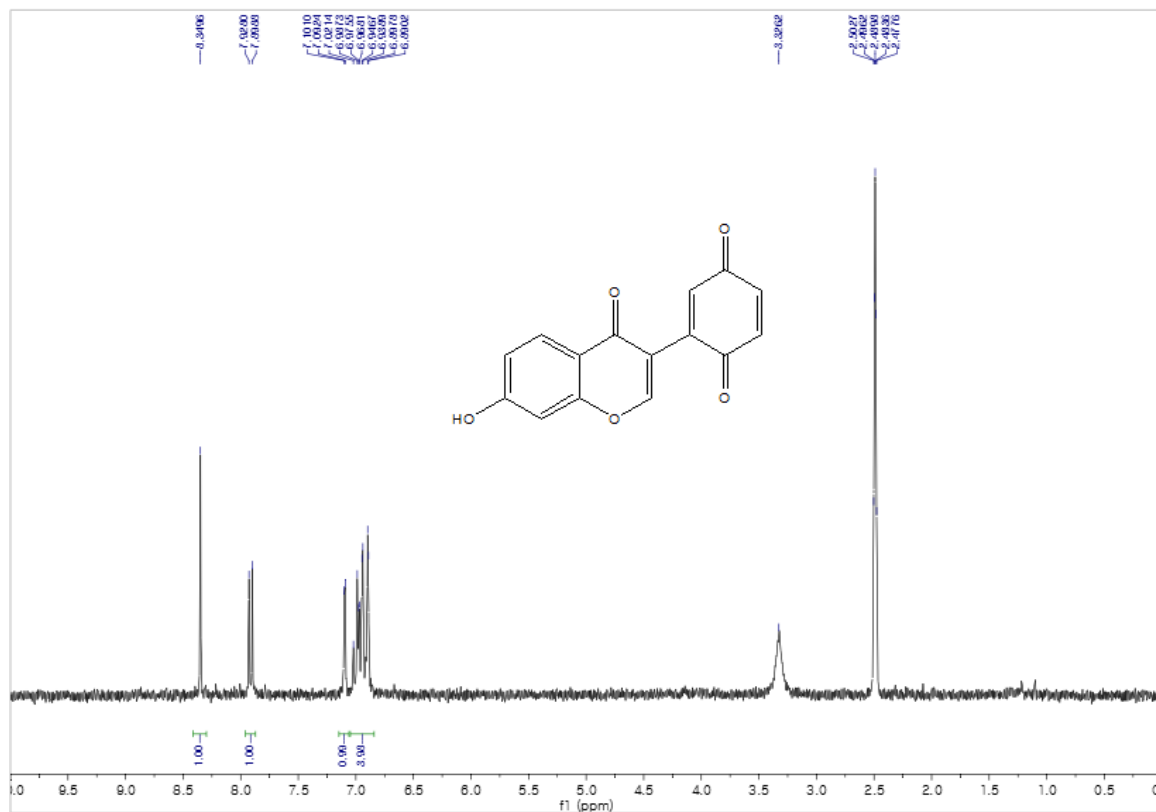

300 MHz,  $^1\text{H}$  NMR in  $\text{DMSO-d}_6$

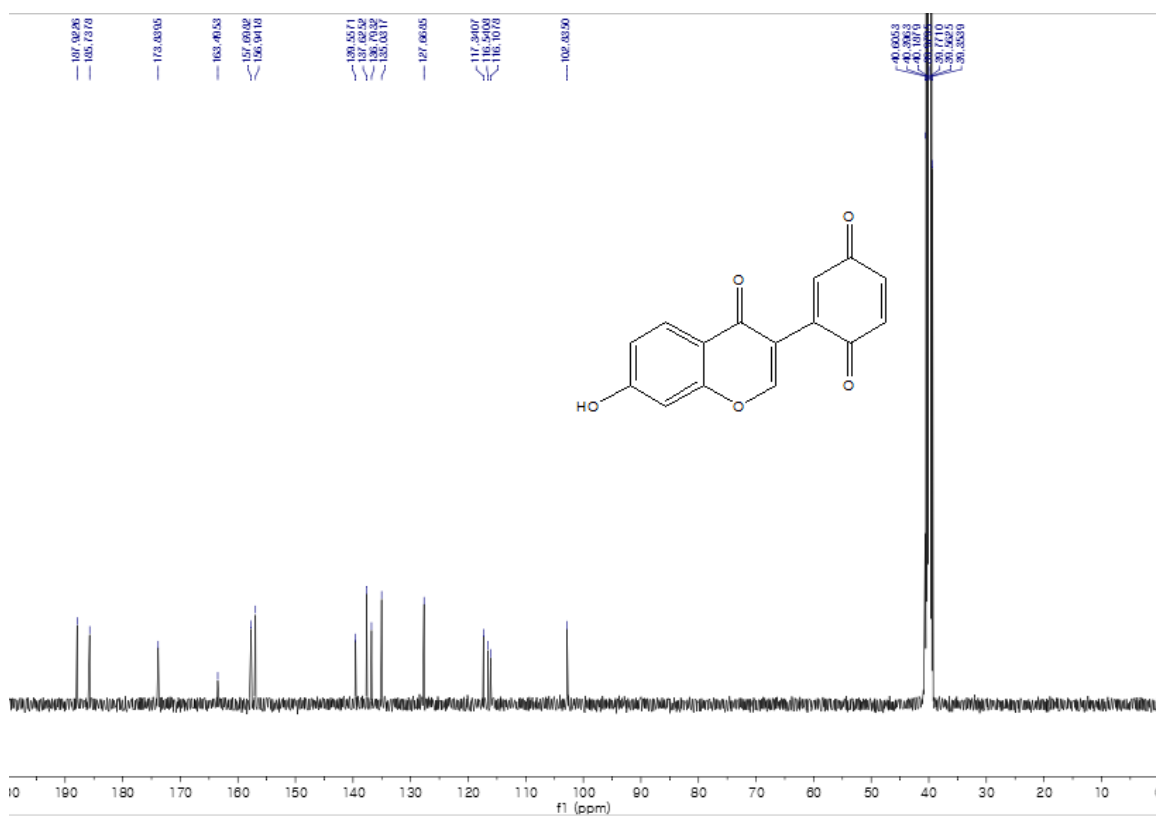

100 MHz,  $^{13}\text{C}$  NMR in  $\text{DMSO-d}_6$

2-methyl-5-(6-methyl-4-oxo-4H-chromen-3-yl)cyclohexa-2,5-diene-1,4-dione (3k, major)

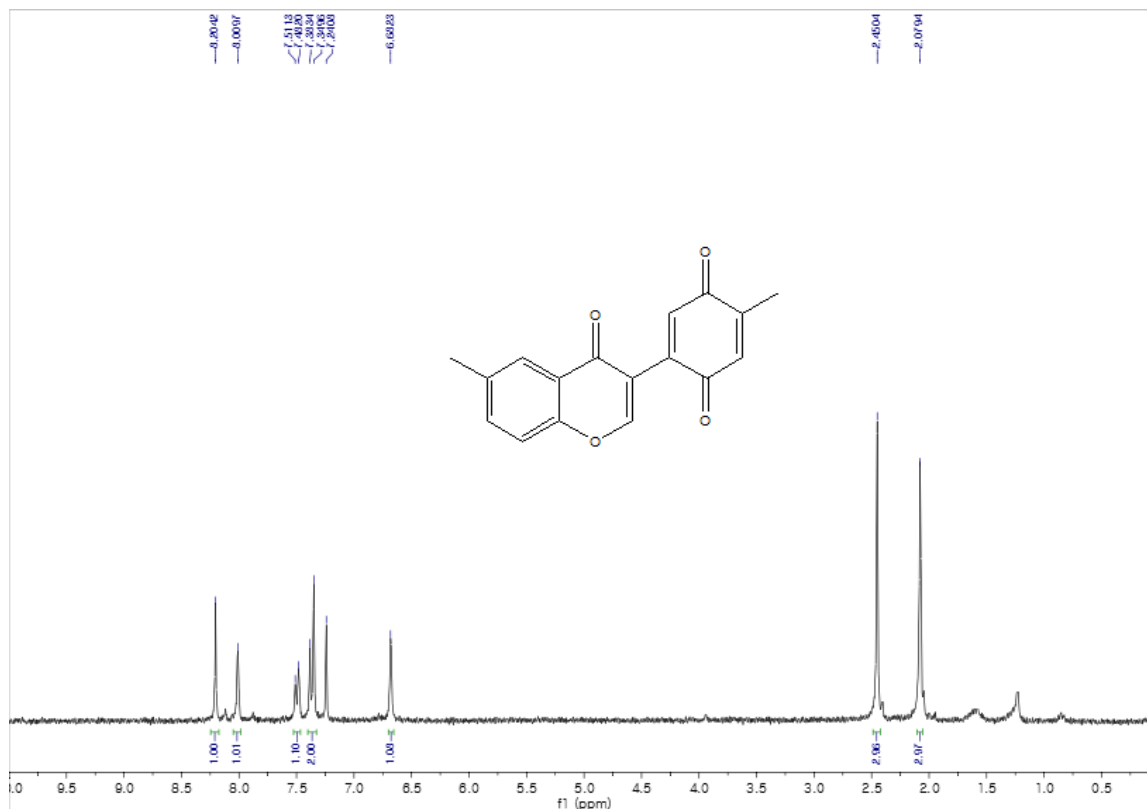

300 MHz, <sup>1</sup>H NMR in CDCl<sub>3</sub>

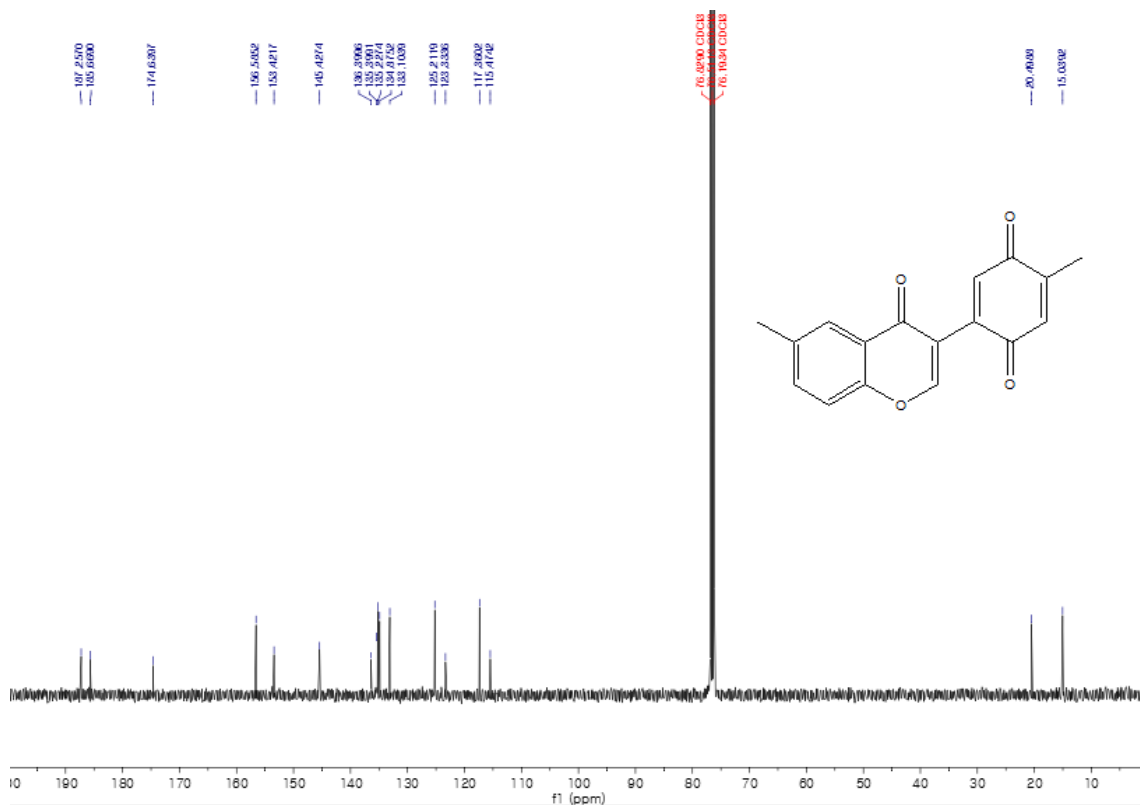

100 MHz, <sup>13</sup>C NMR in CDCl<sub>3</sub>

2-methyl-6-(6-methyl-4-oxo-4H-chromen-3-yl)cyclohexa-2,5-diene-1,4-dione (3k)

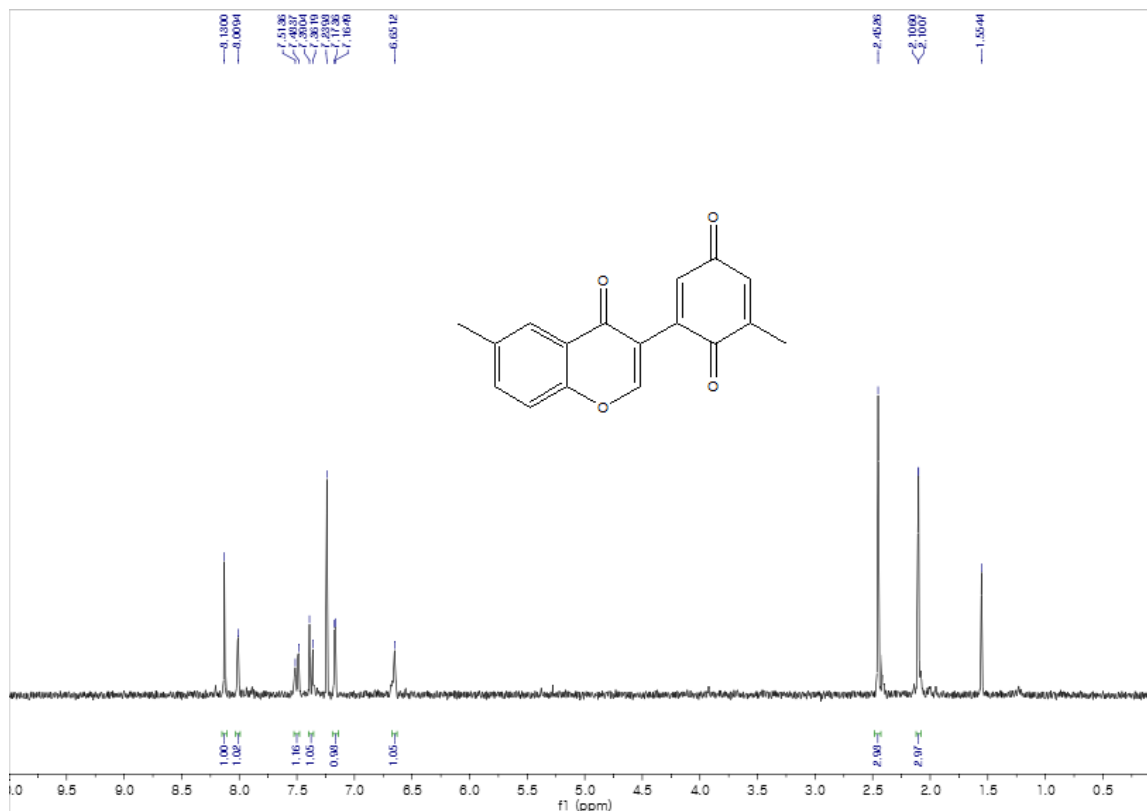

300 MHz,  $^1\text{H}$  NMR in  $\text{CDCl}_3$

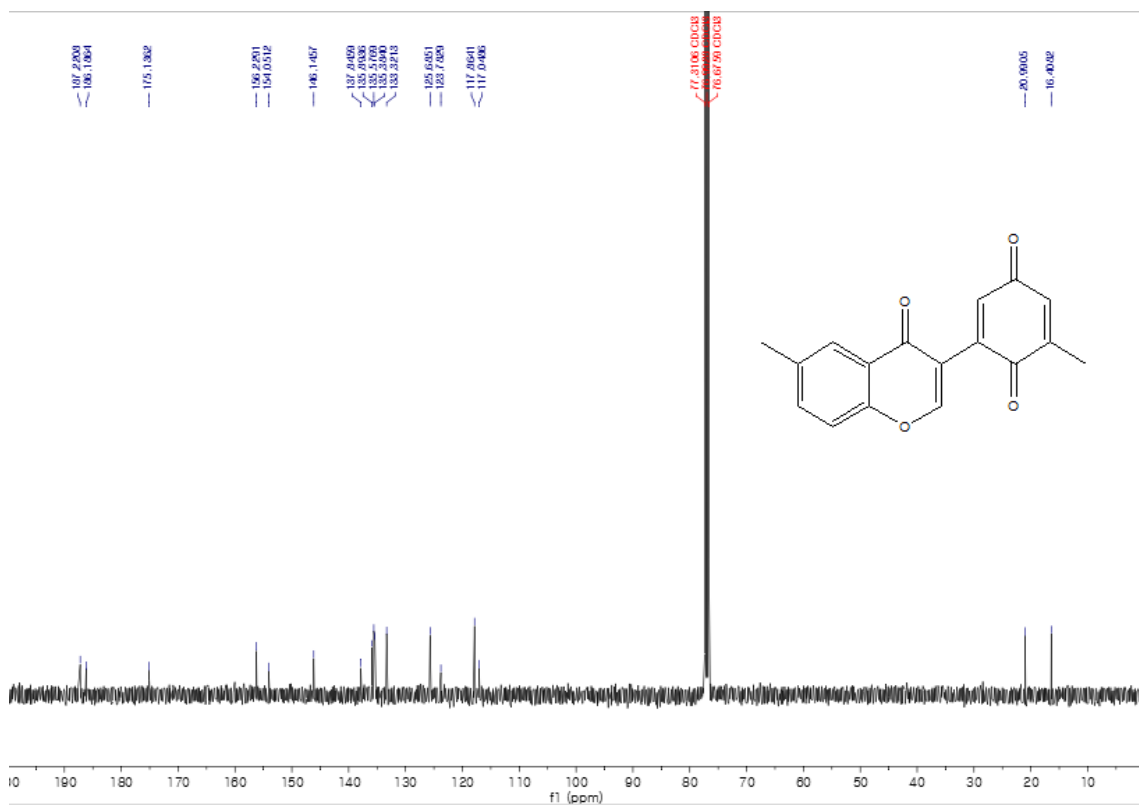

100 MHz,  $^{13}\text{C}$  NMR in  $\text{CDCl}_3$

2-methoxy-5-(6-methyl-4-oxo-4H-chromen-3-yl)cyclohexa-2,5-diene-1,4-dione (31, major)

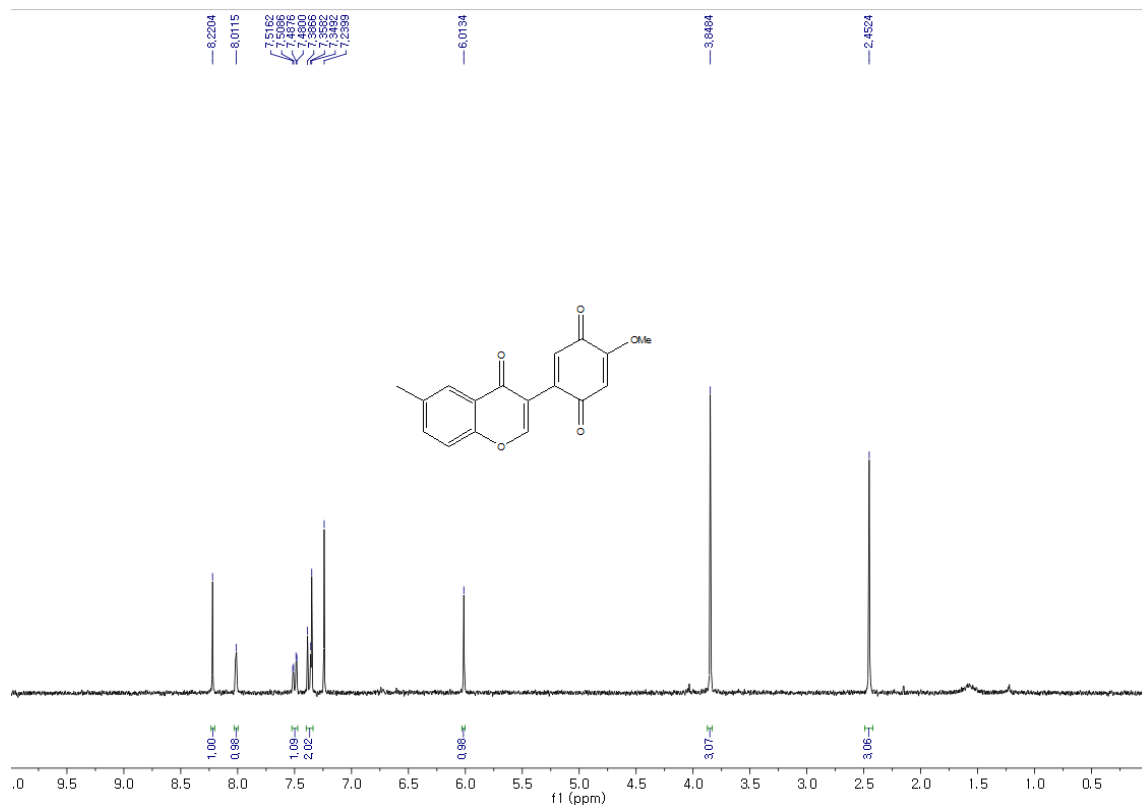

300 MHz, <sup>1</sup>H NMR in CDCl<sub>3</sub>

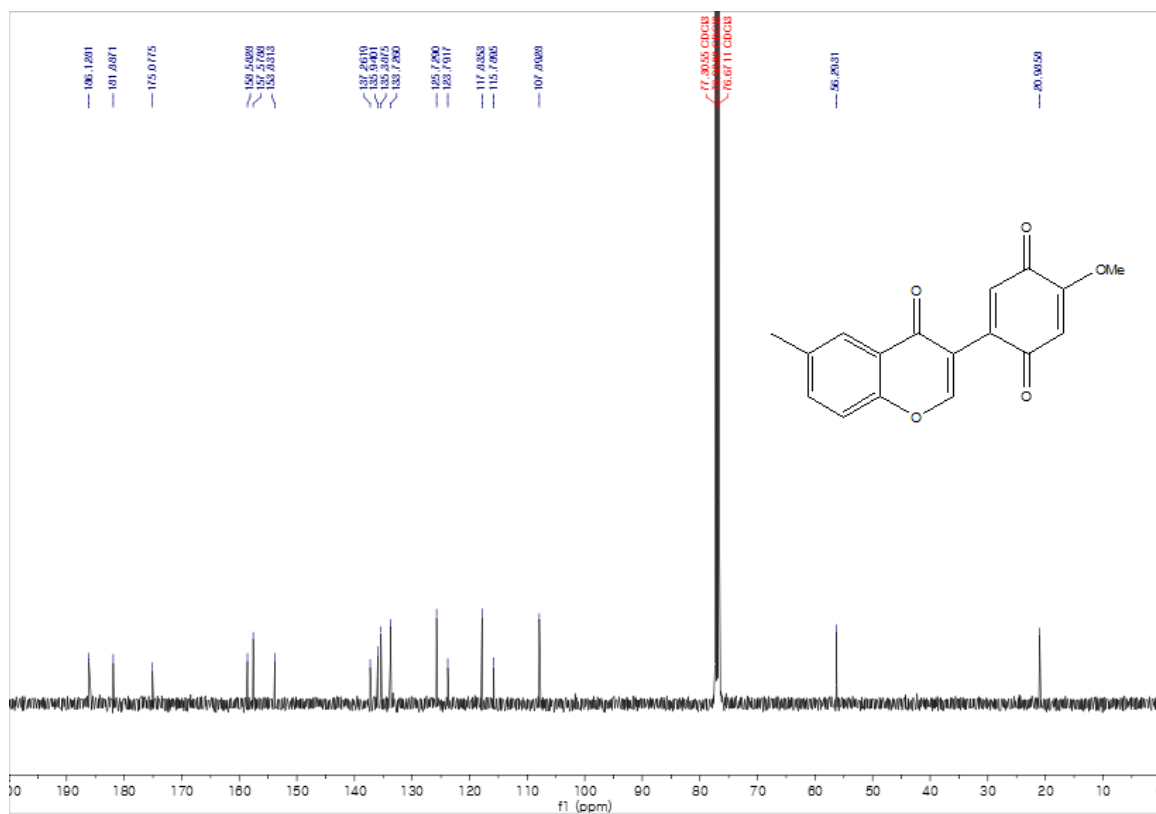

100 MHz, <sup>13</sup>C NMR in CDCl<sub>3</sub>

2-methoxy-6-(6-methyl-4-oxo-4H-chromen-3-yl)cyclohexa-2,5-diene-1,4-dione (3l)

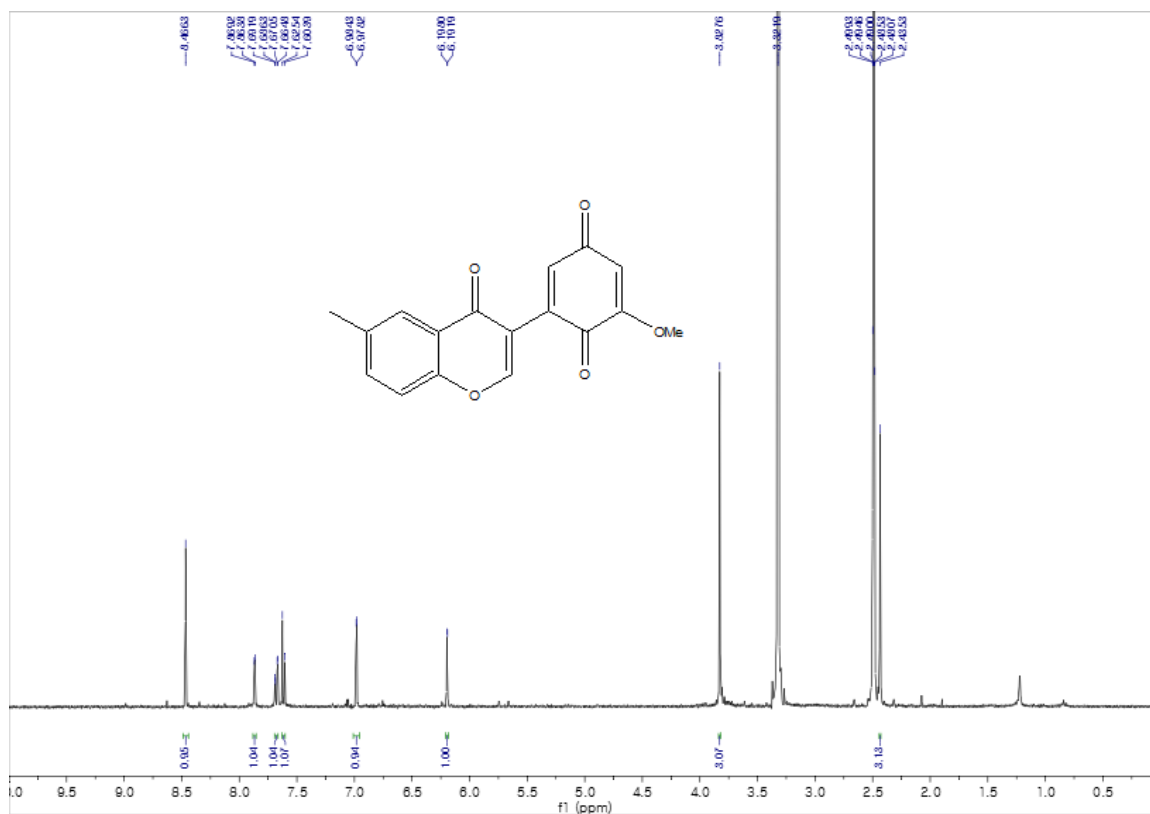

400 MHz,  $^1\text{H}$  NMR in  $\text{DMSO-d}_6$

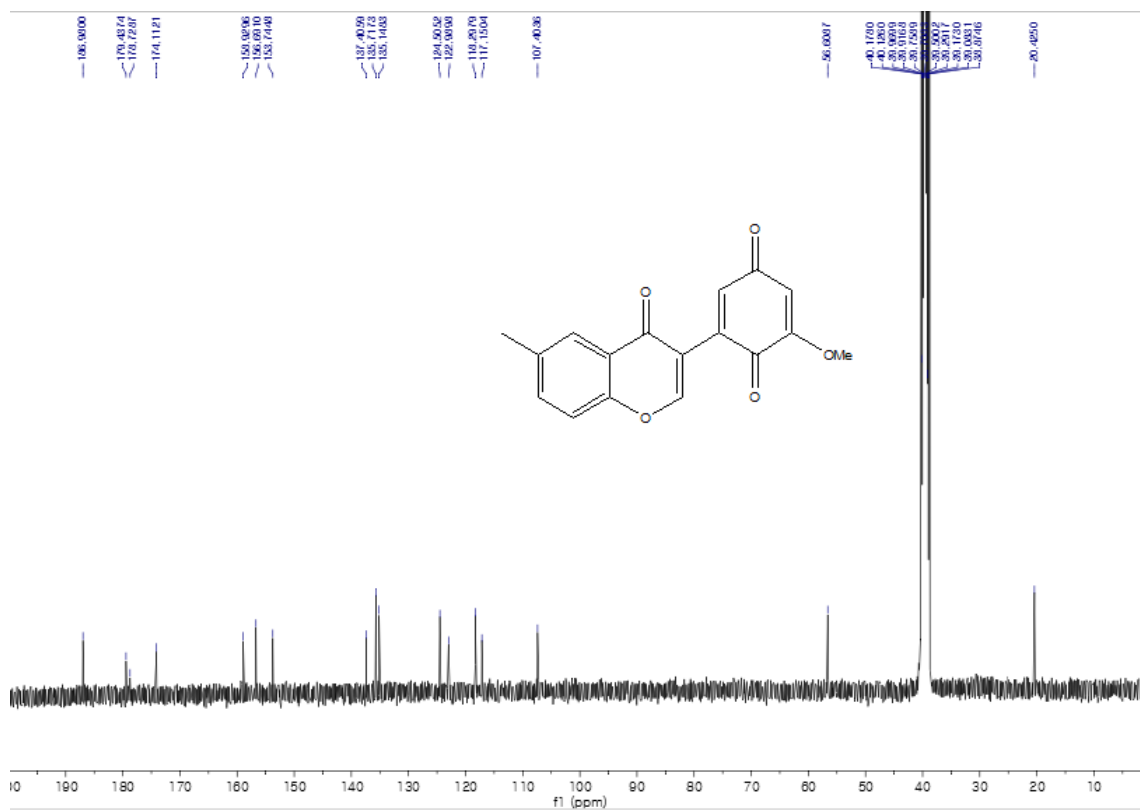

100 MHz,  $^{13}\text{C}$  NMR in  $\text{DMSO-d}_6$

2-tert-butyl-5-(6-methyl-4-oxo-4H-chromen-3-yl)cyclohexa-2,5-diene-1,4-dione (3m)

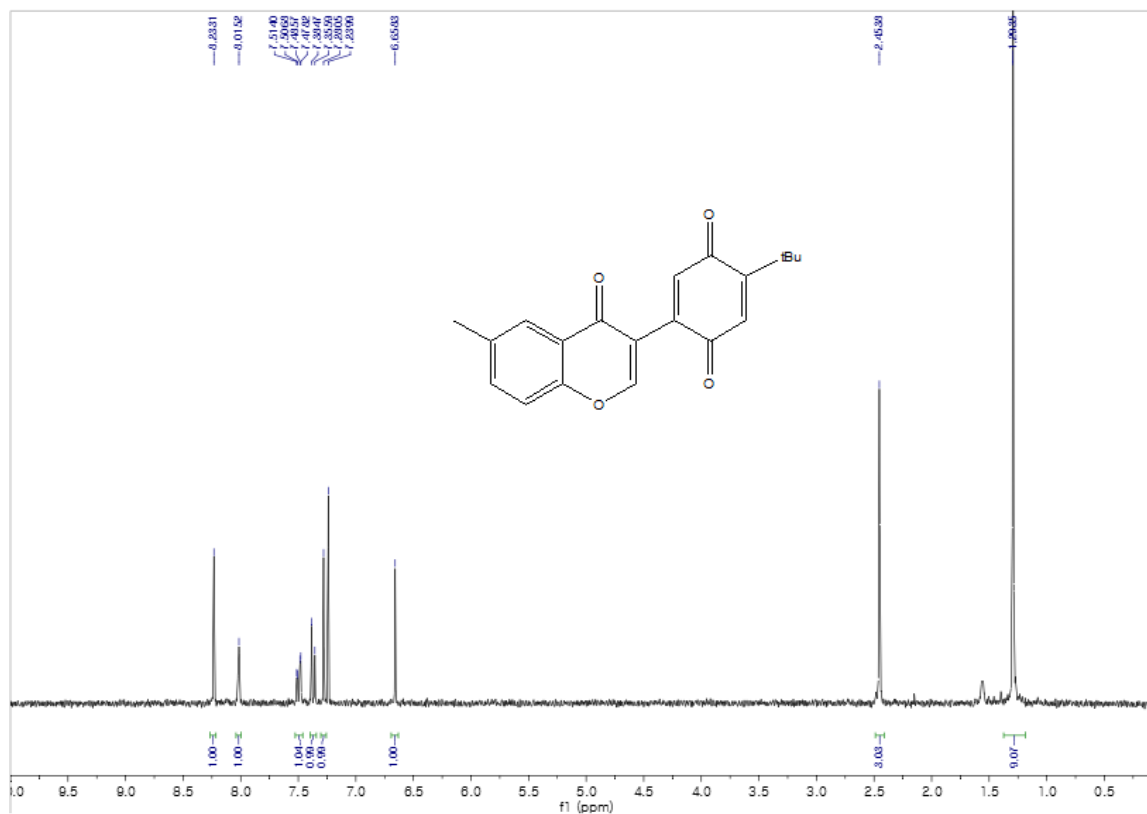

300 MHz,  $^1\text{H NMR}$  in  $\text{CDCl}_3$

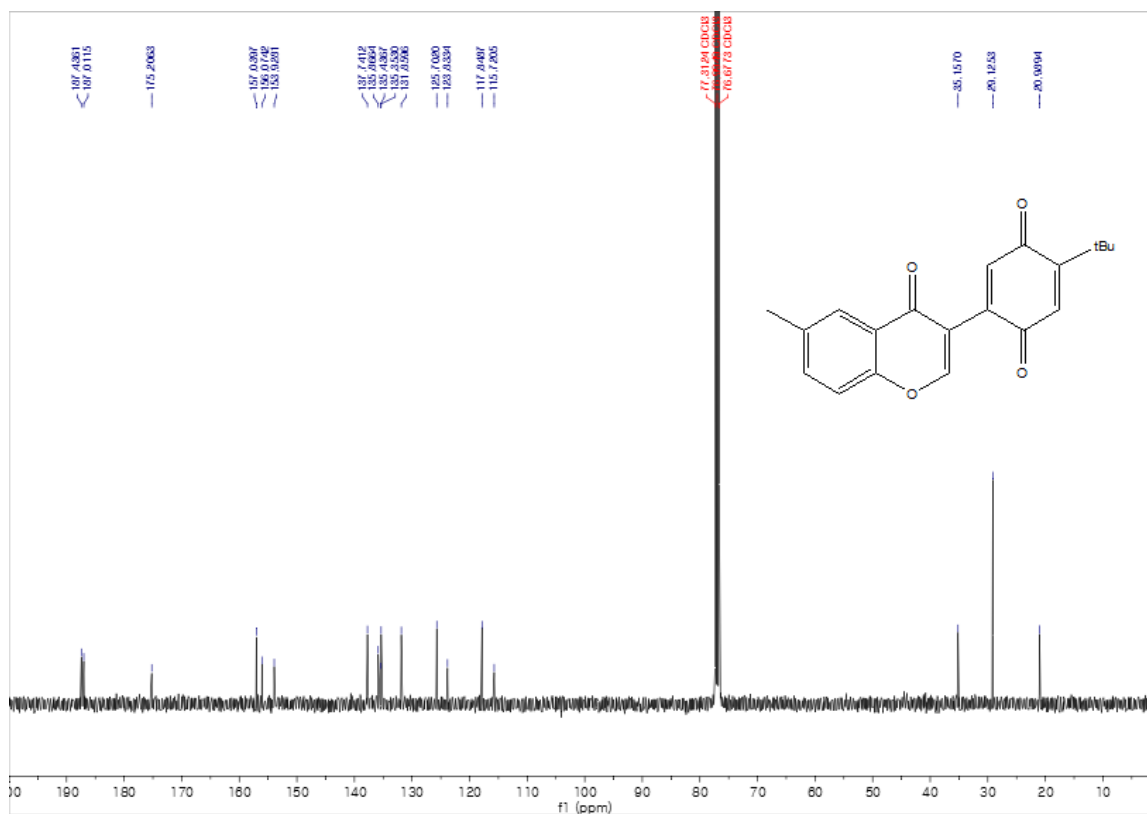

100 MHz,  $^{13}\text{C NMR}$  in  $\text{CDCl}_3$

2-tert-butyl-6-(6-methyl-4-oxo-4H-chromen-3-yl)cyclohexa-2,5-diene-1,4-dione (3m, major)

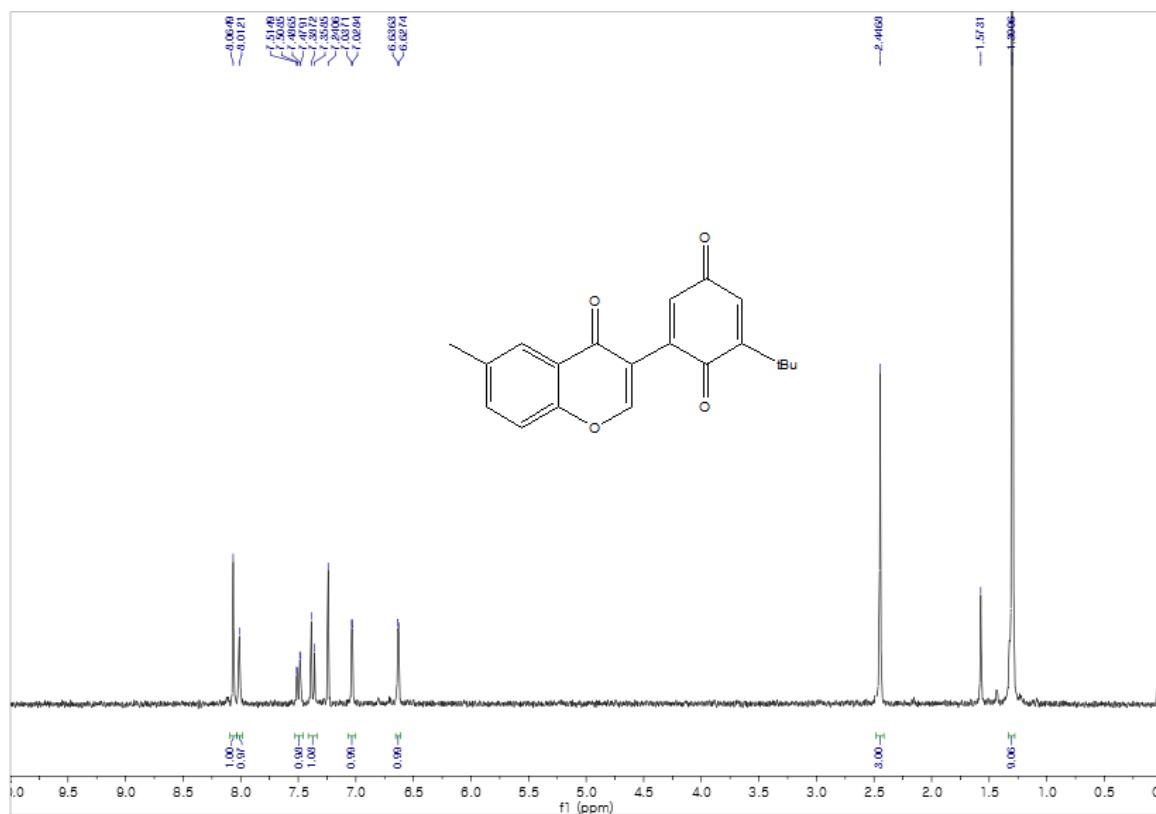

300 MHz, <sup>1</sup>H NMR in CDCl<sub>3</sub>

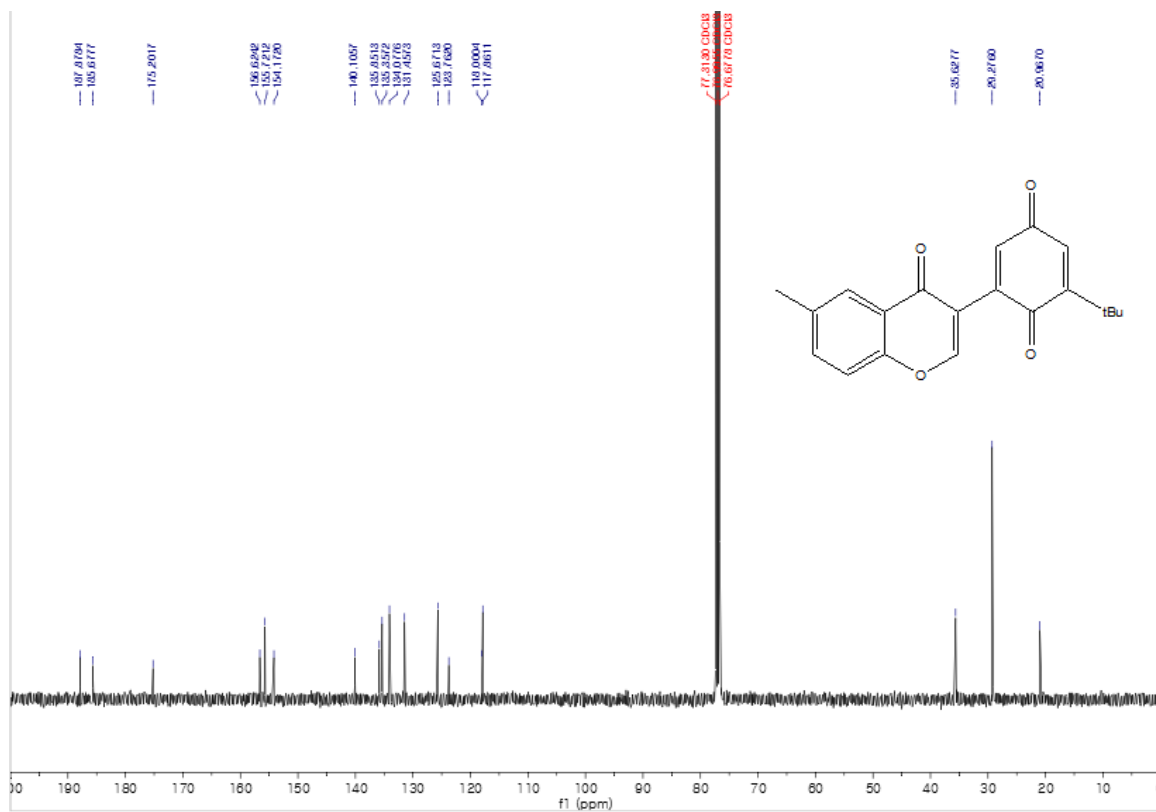

100 MHz, <sup>13</sup>C NMR in CDCl<sub>3</sub>

2-chloro-5-(6-methyl-4-oxo-4H-chromen-3-yl)cyclohexa-2,5-diene-1,4-dione (3n, major)

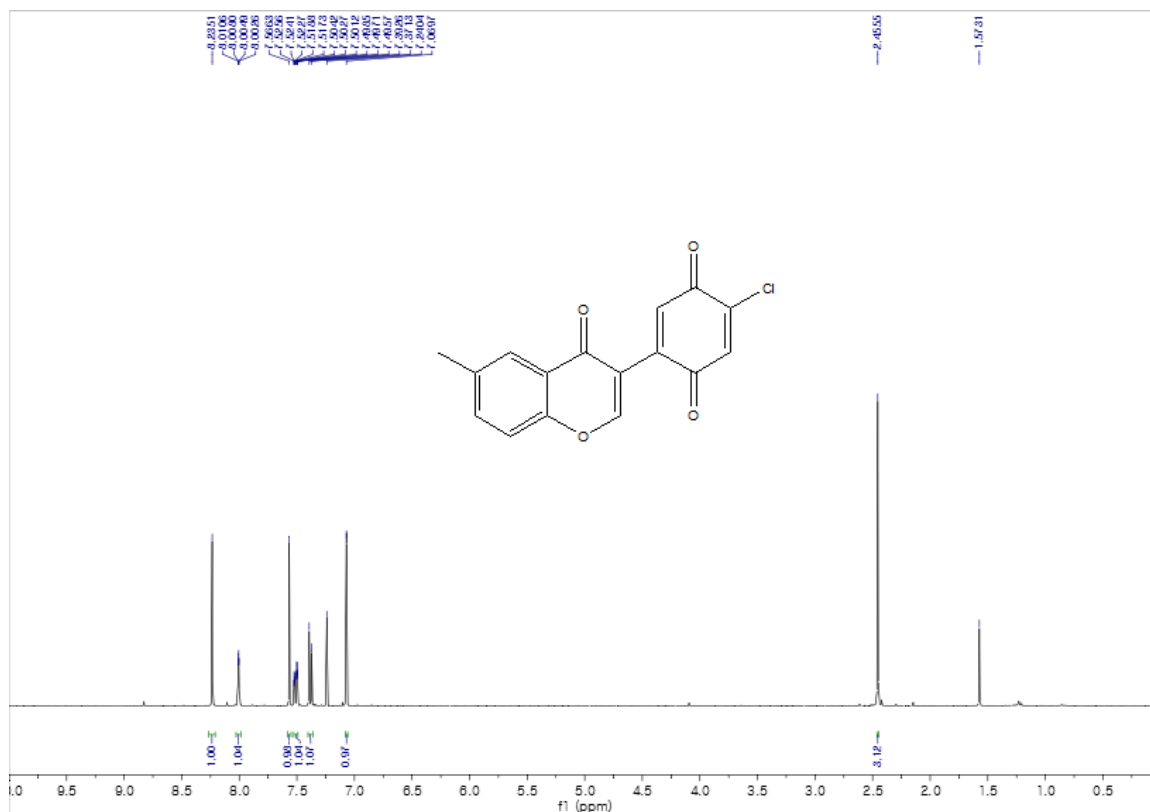

400 MHz,  $^1\text{H}$  NMR in  $\text{CDCl}_3$

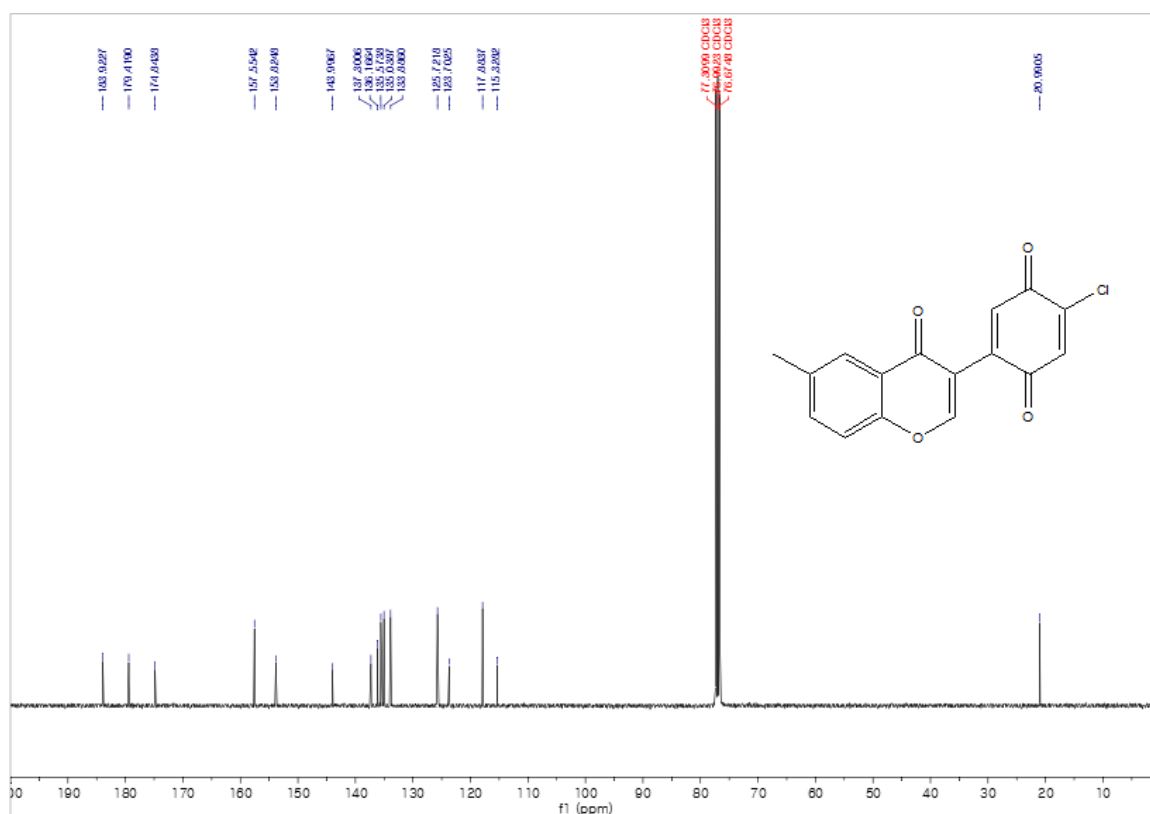

100 MHz,  $^{13}\text{C}$  NMR in  $\text{CDCl}_3$



2-chloro-6-(6-methyl-4-oxo-4H-chromen-3-yl)cyclohexa-2,5-diene-1,4-dione (3n)

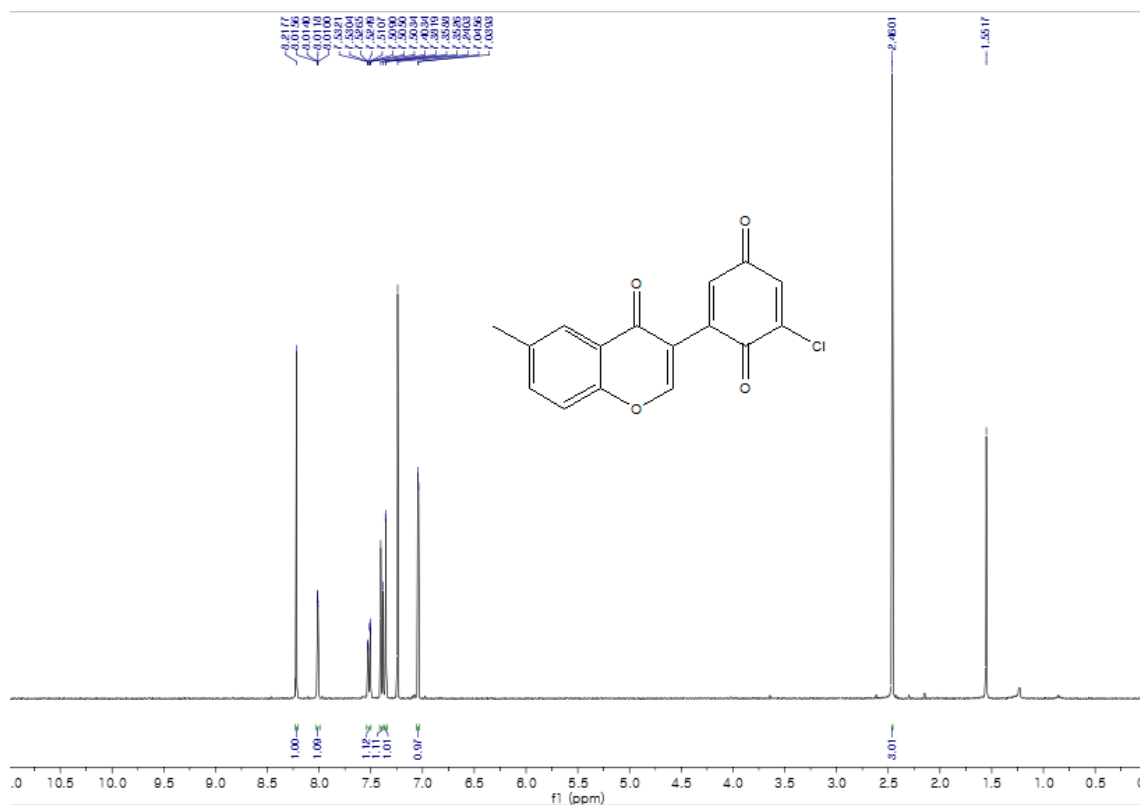

400 MHz, <sup>1</sup>H NMR in CDCl<sub>3</sub>

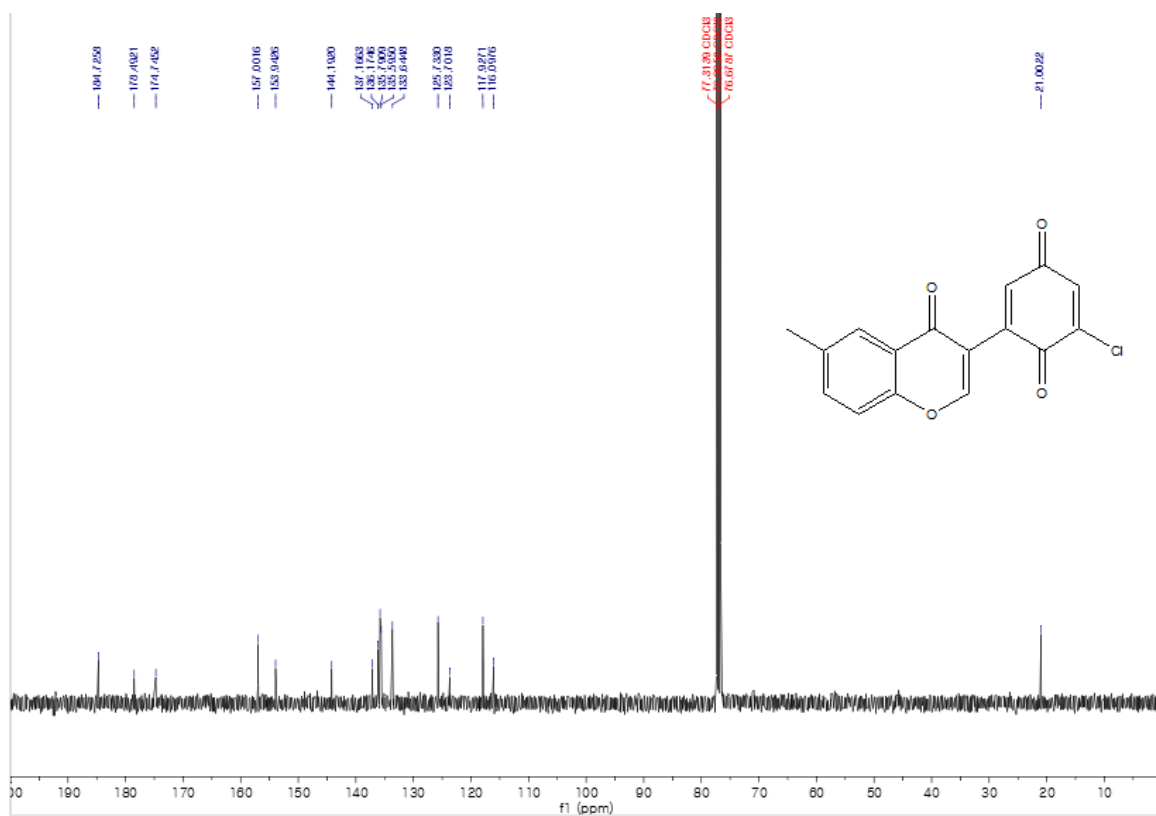

100 MHz, <sup>13</sup>C NMR in CDCl<sub>3</sub>

2-chloro-5-(6-methyl-4-oxo-4H-chromen-3-yl)cyclohexa-2,5-diene-1,4-dione (3o, major)

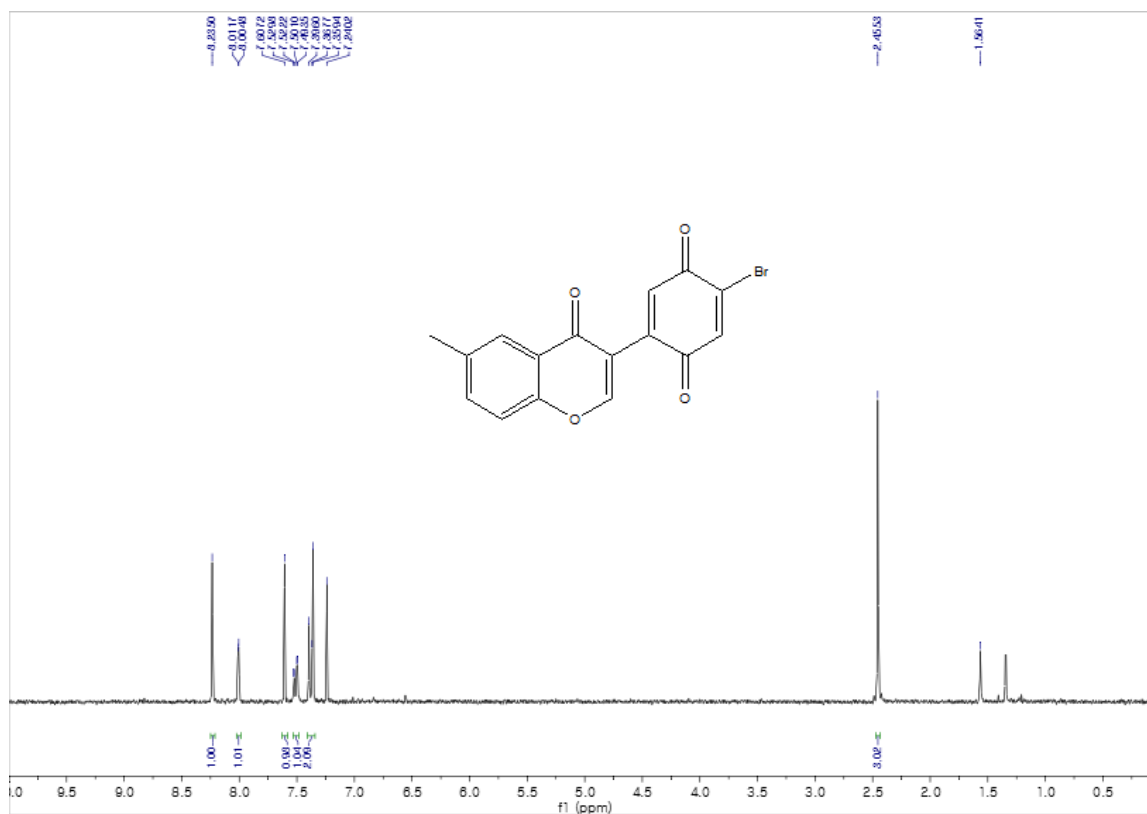

300 MHz,  $^1\text{H}$  NMR in  $\text{CDCl}_3$

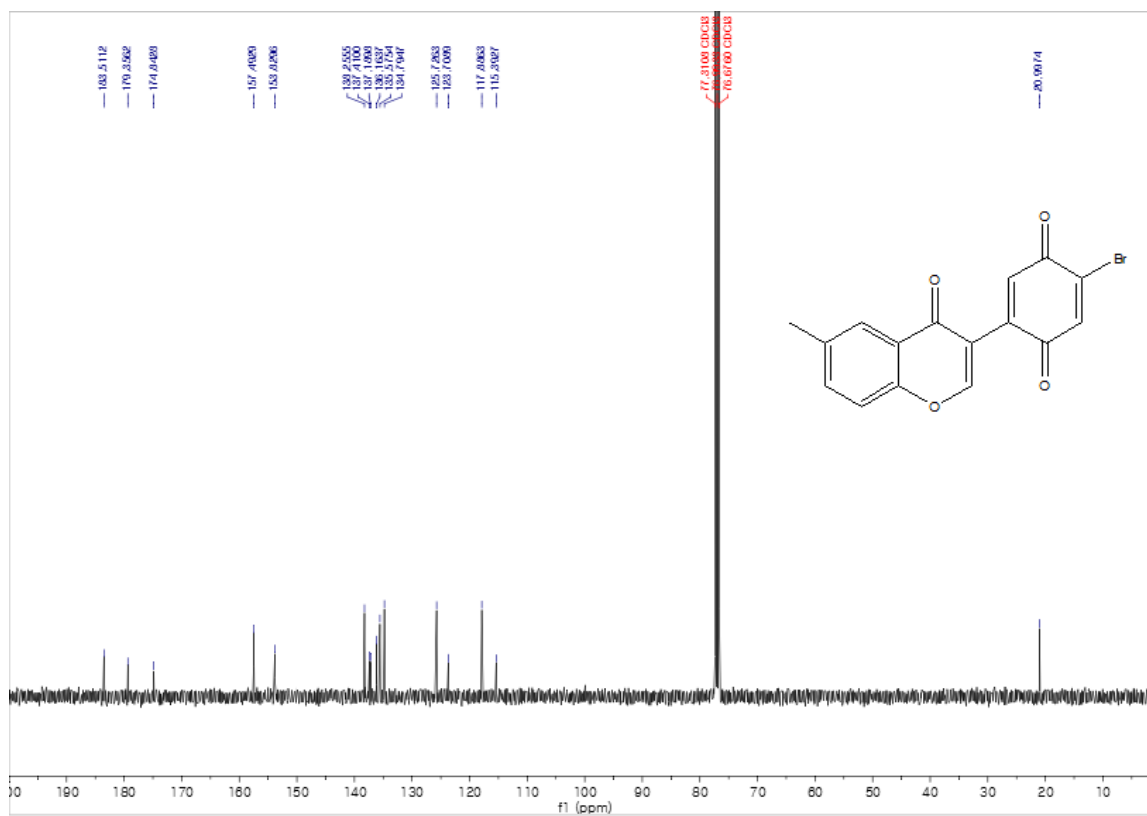

100 MHz,  $^{13}\text{C}$  NMR in  $\text{CDCl}_3$

**2-bromo-6-(6-methyl-4-oxo-4H-chromen-3-yl)cyclohexa-2,5-diene-1,4-dione (3o)**

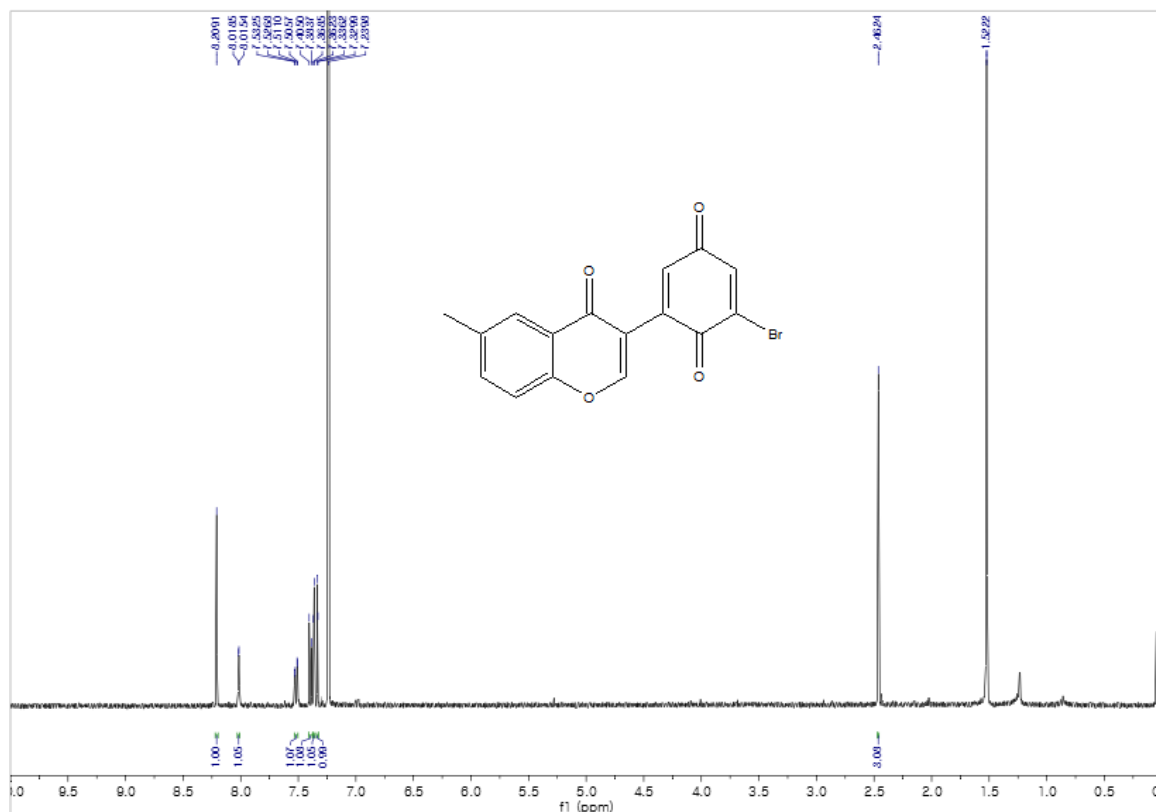

400 MHz, <sup>1</sup>H NMR in CDCl<sub>3</sub>

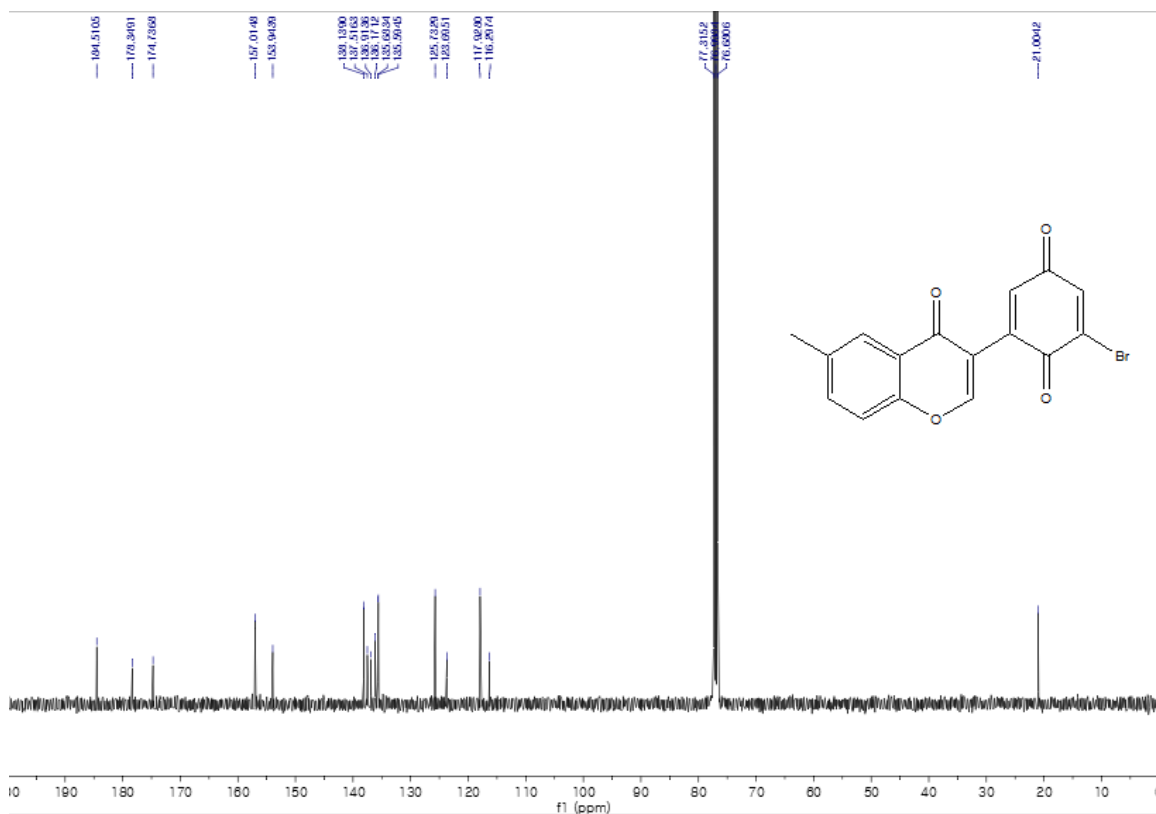

100 MHz, <sup>13</sup>C NMR in CDCl<sub>3</sub>

2-(6-methyl-4-oxo-4H-chromen-3-yl)-5-phenylcyclohexa-2,5-diene-1,4-dione (3p)

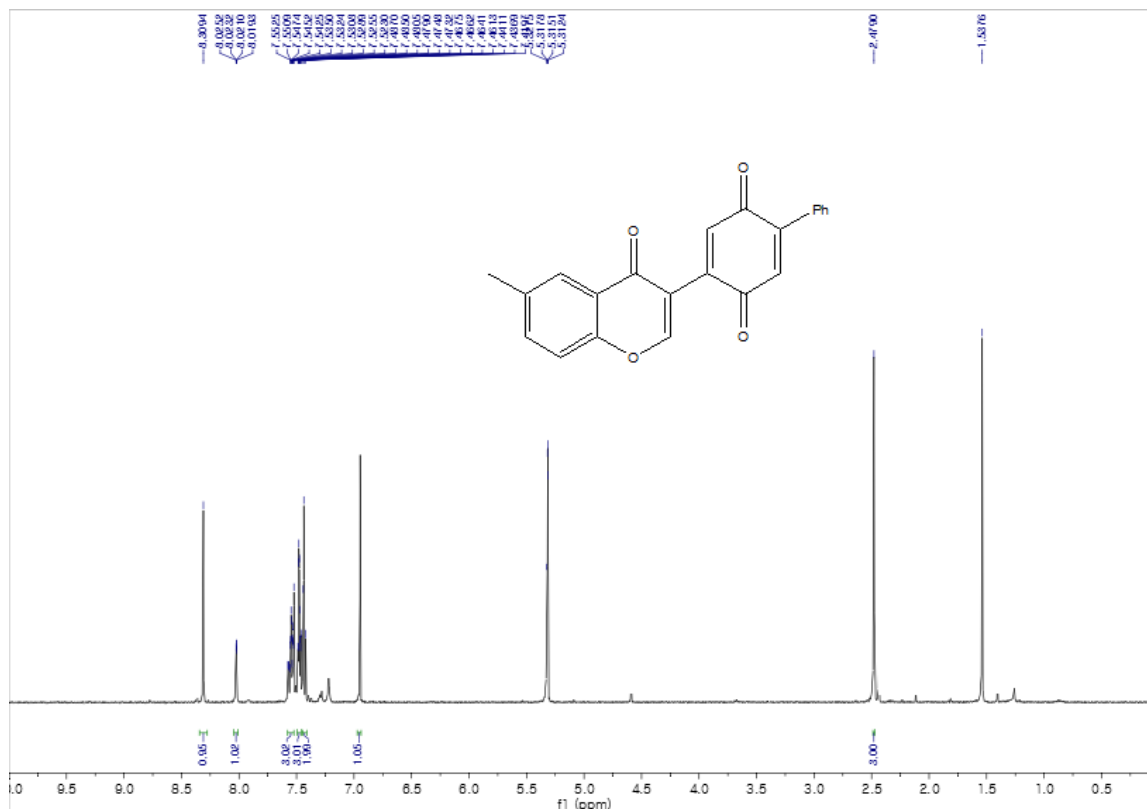

400 MHz,  $^1\text{H}$  NMR in  $\text{CD}_2\text{Cl}_2$

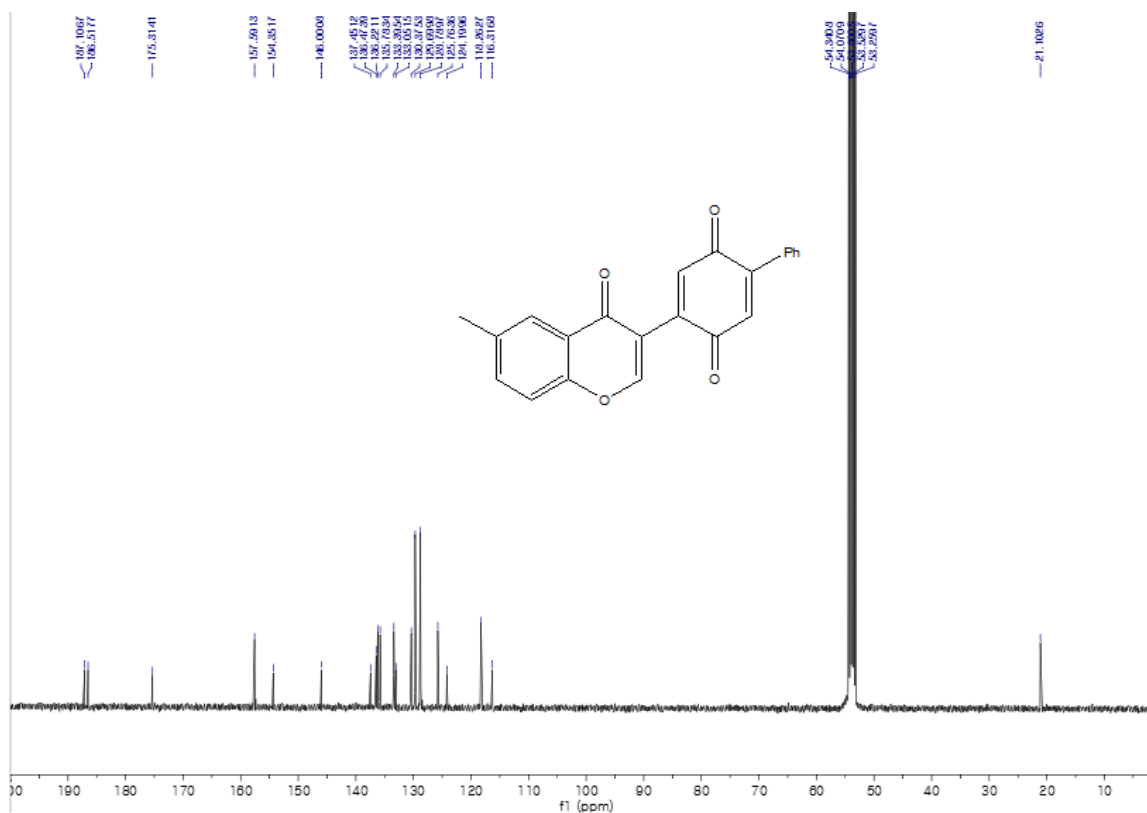

100 MHz,  $^{13}\text{C}$  NMR in  $\text{CD}_2\text{Cl}_2$

2-(6-methyl-4-oxo-4H-chromen-3-yl)-6-phenylcyclohexa-2,5-diene-1,4-dione (3p)

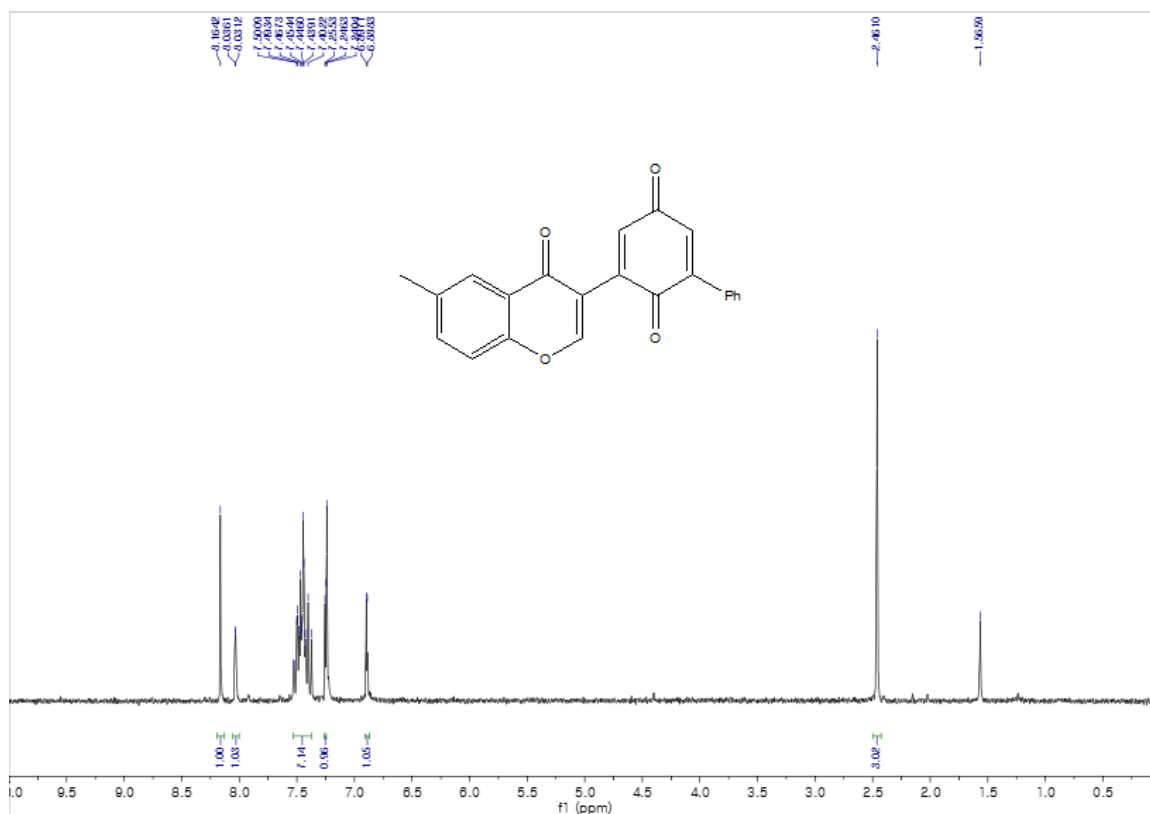

300 MHz,  $^1\text{H NMR}$  in  $\text{CDCl}_3$

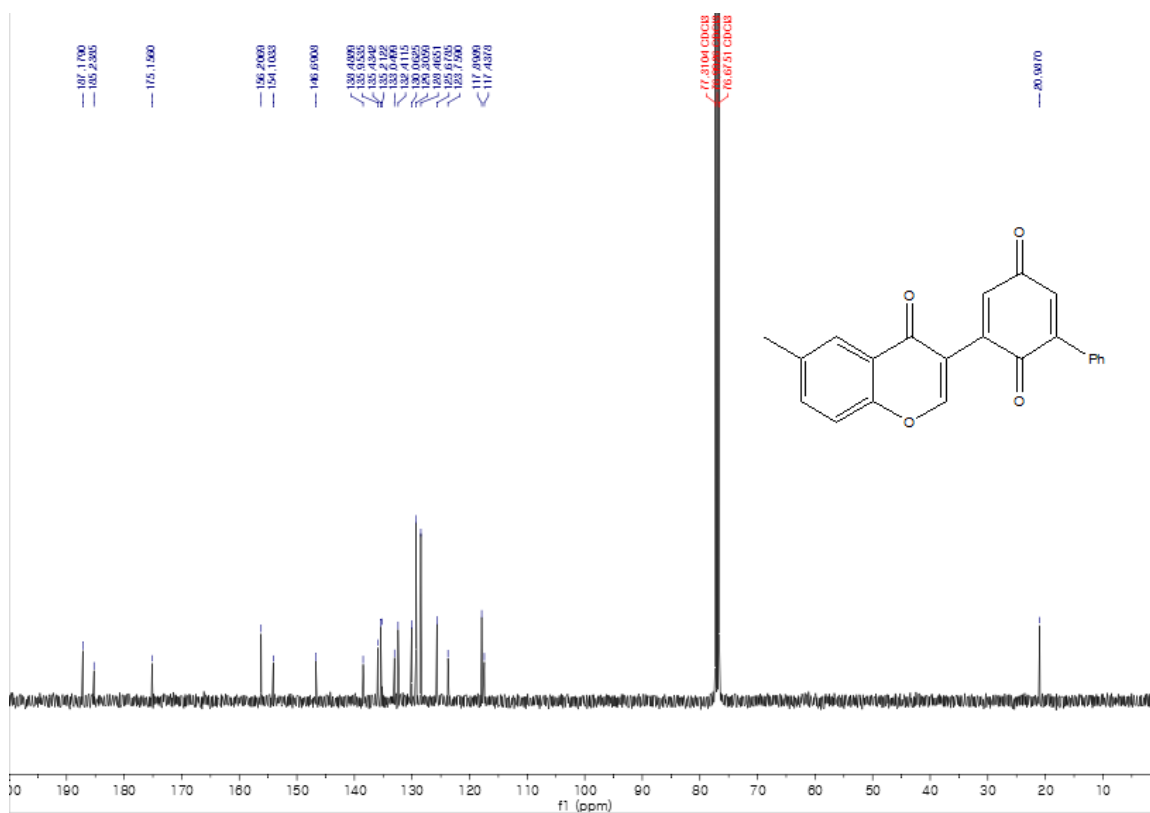

100 MHz,  $^{13}\text{C NMR}$  in  $\text{CDCl}_3$

2-cyclohexyl-5-(6-methyl-4-oxo-4H-chromen-3-yl)cyclohexa-2,5-diene-1,4-dione (3q)

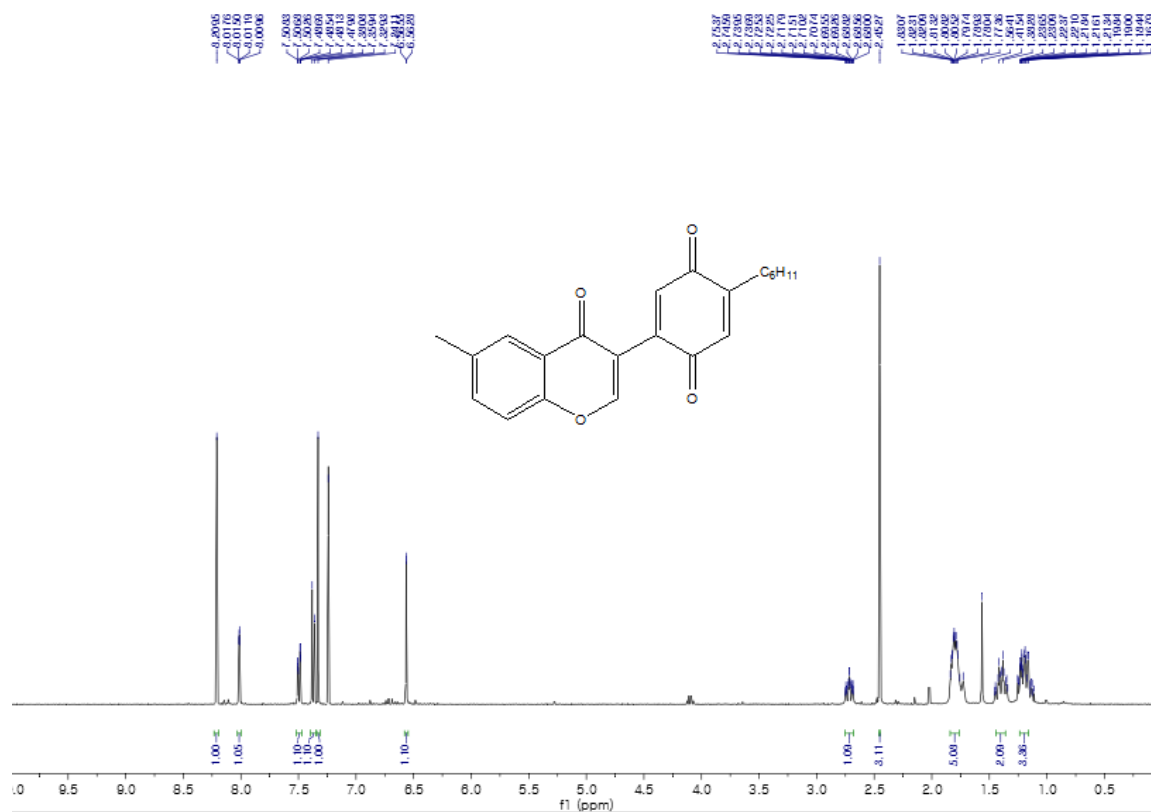

400 MHz,  $^1\text{H}$  NMR in  $\text{CDCl}_3$

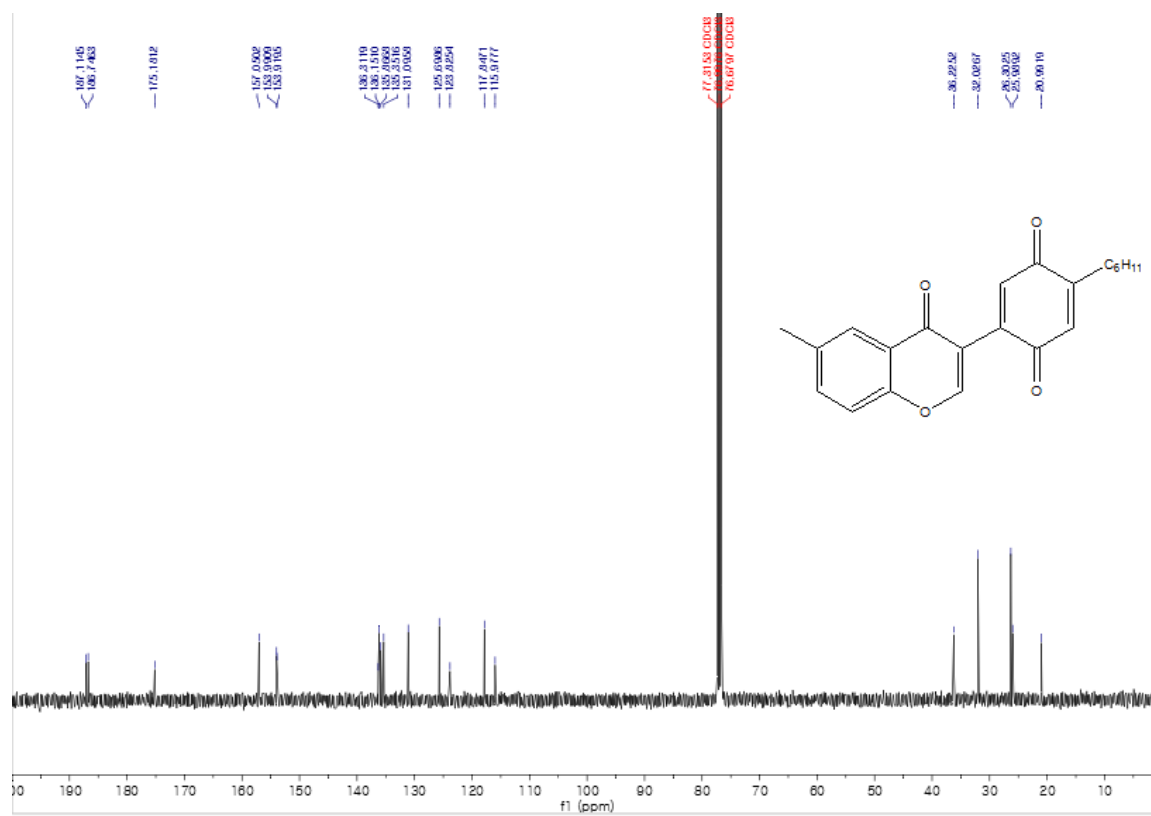

100 MHz,  $^{13}\text{C}$  NMR in  $\text{CDCl}_3$

2-cyclohexyl-6-(6-methyl-4-oxo-4H-chromen-3-yl)cyclohexa-2,5-diene-1,4-dione (3q, major)

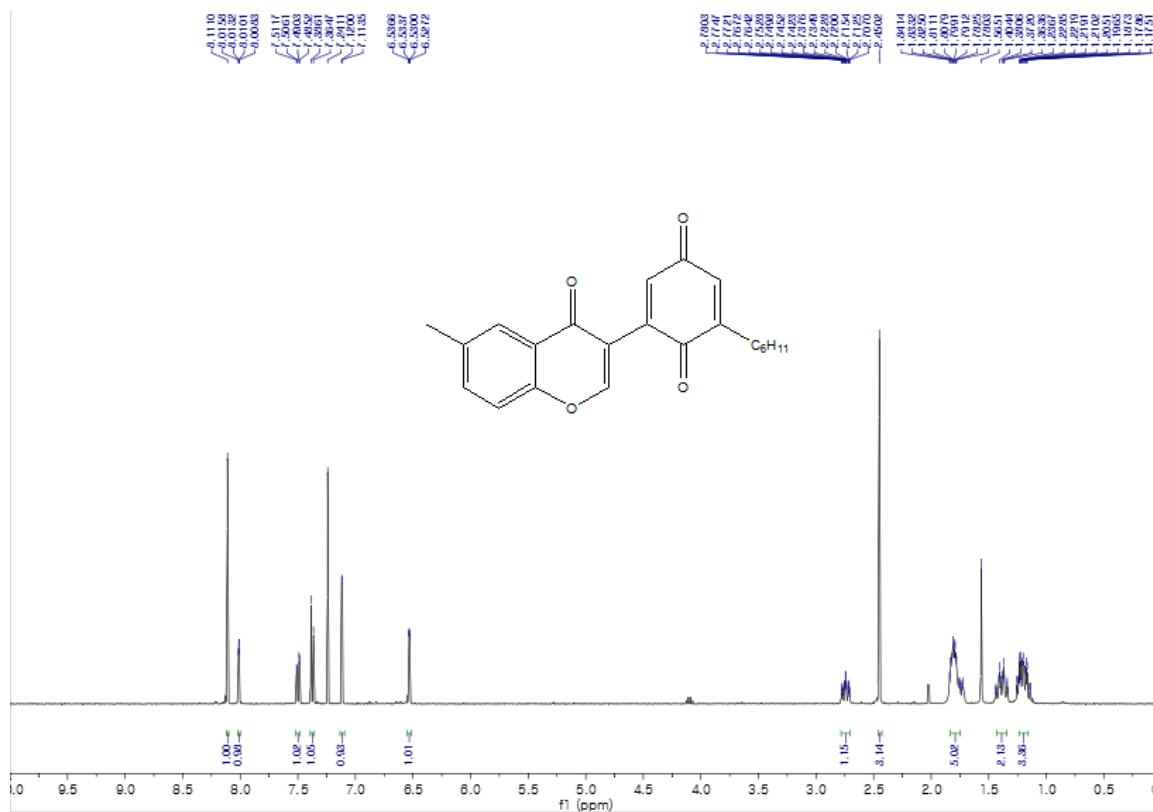

400 MHz,  $^1\text{H}$  NMR in  $\text{CDCl}_3$

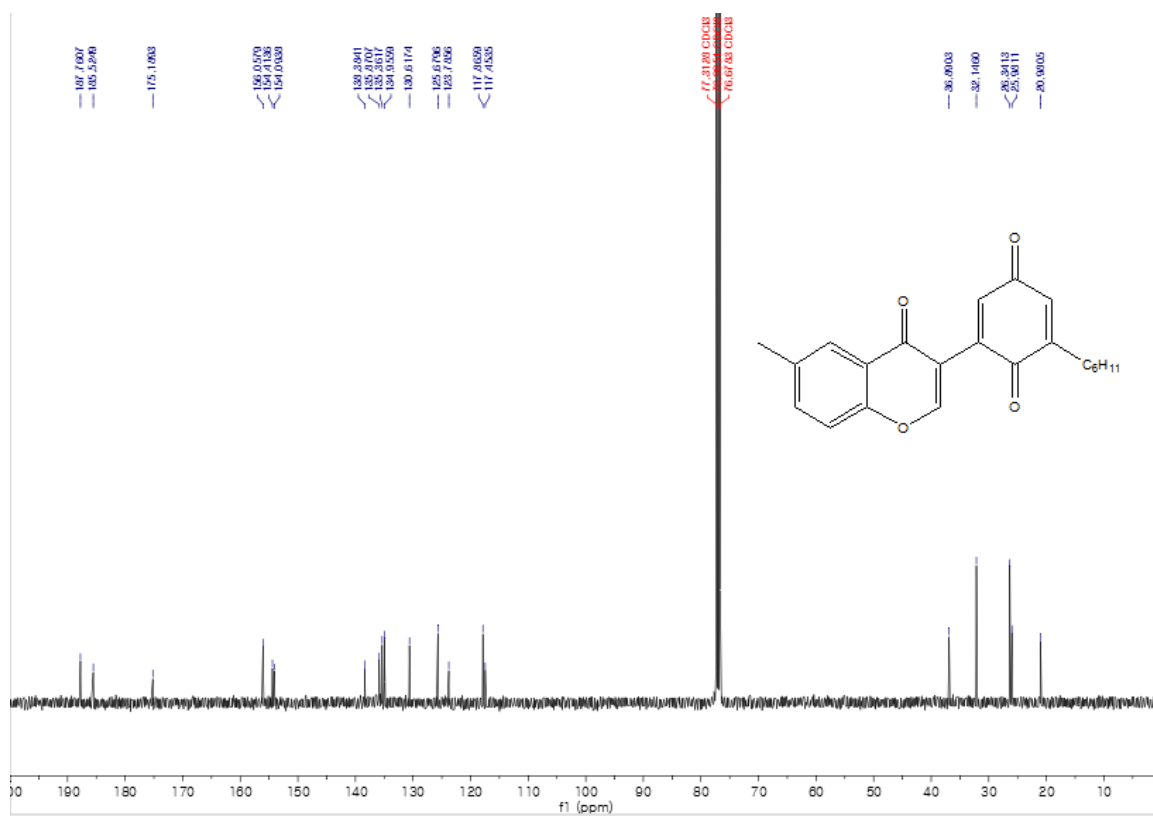

100 MHz,  $^{13}\text{C}$  NMR in  $\text{CDCl}_3$

**2-(4-oxo-4H-chromen-3-yl)naphthalene-1,4-dione (3r)**

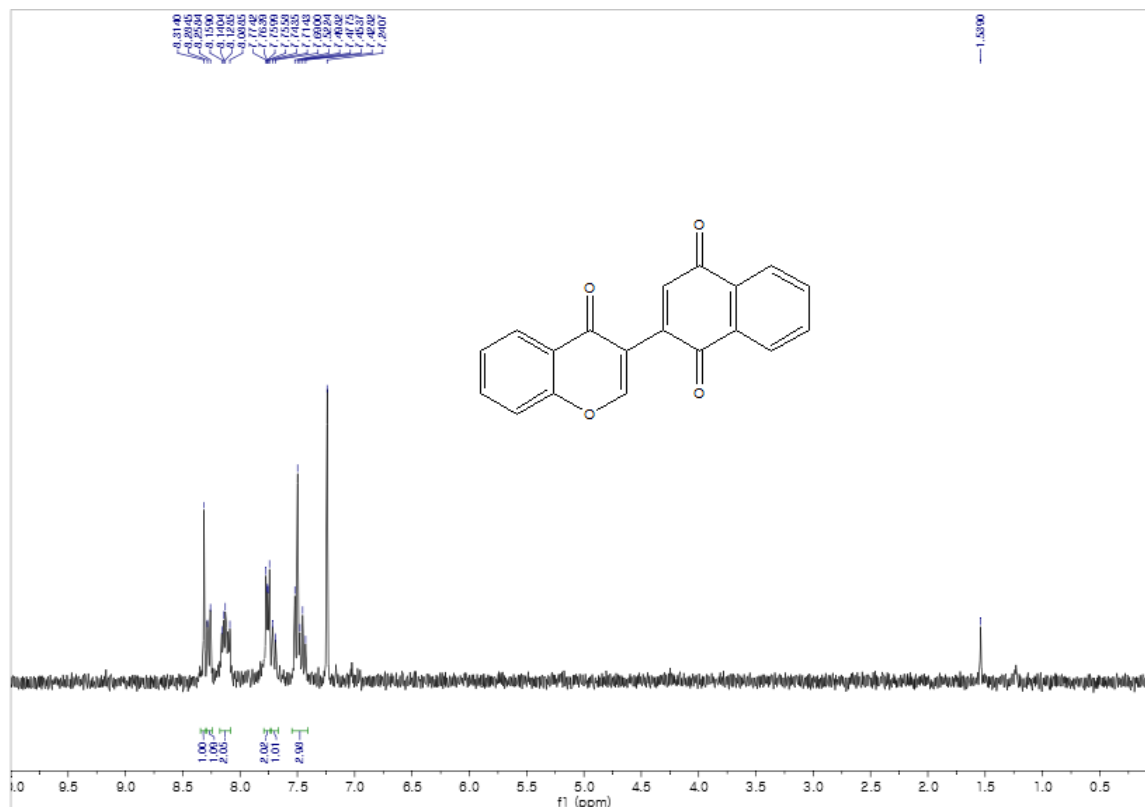

**300 MHz, <sup>1</sup>H NMR in CDCl<sub>3</sub>**

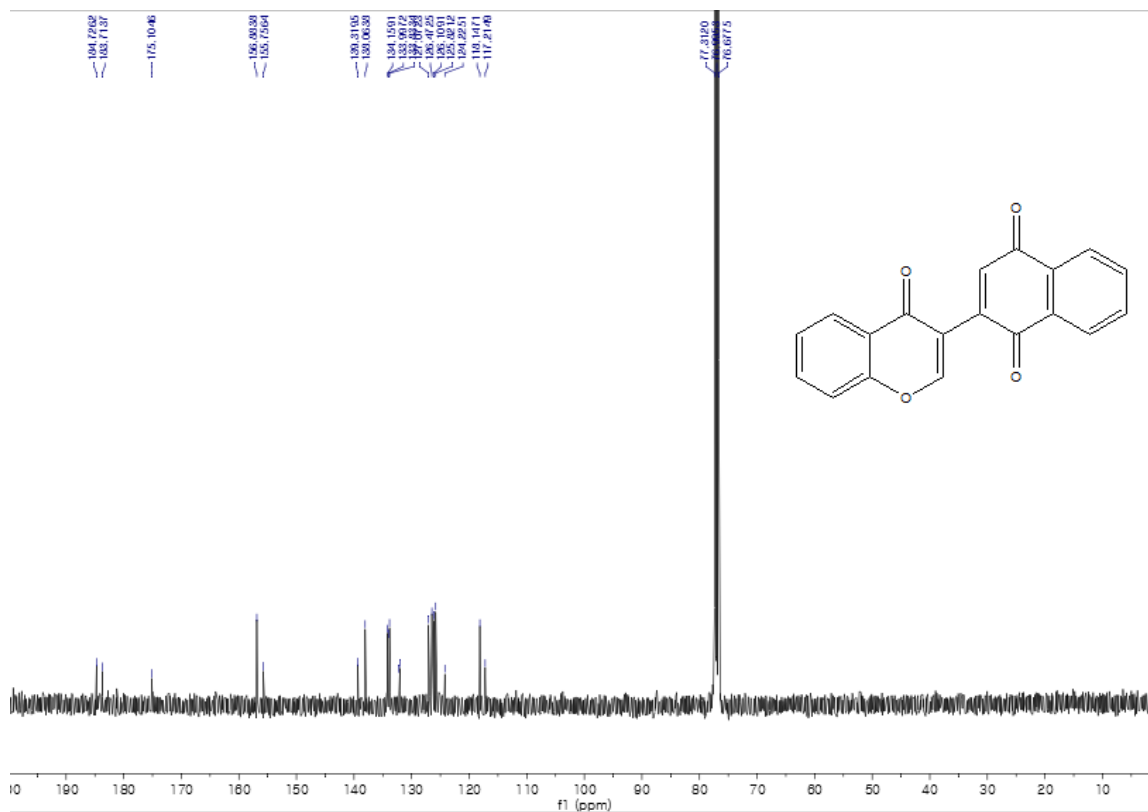

**100 MHz, <sup>13</sup>C NMR in CDCl<sub>3</sub>**



2-(6-methyl-4-oxo-4H-chromen-3-yl)naphthalene-1,4-dione (3s)

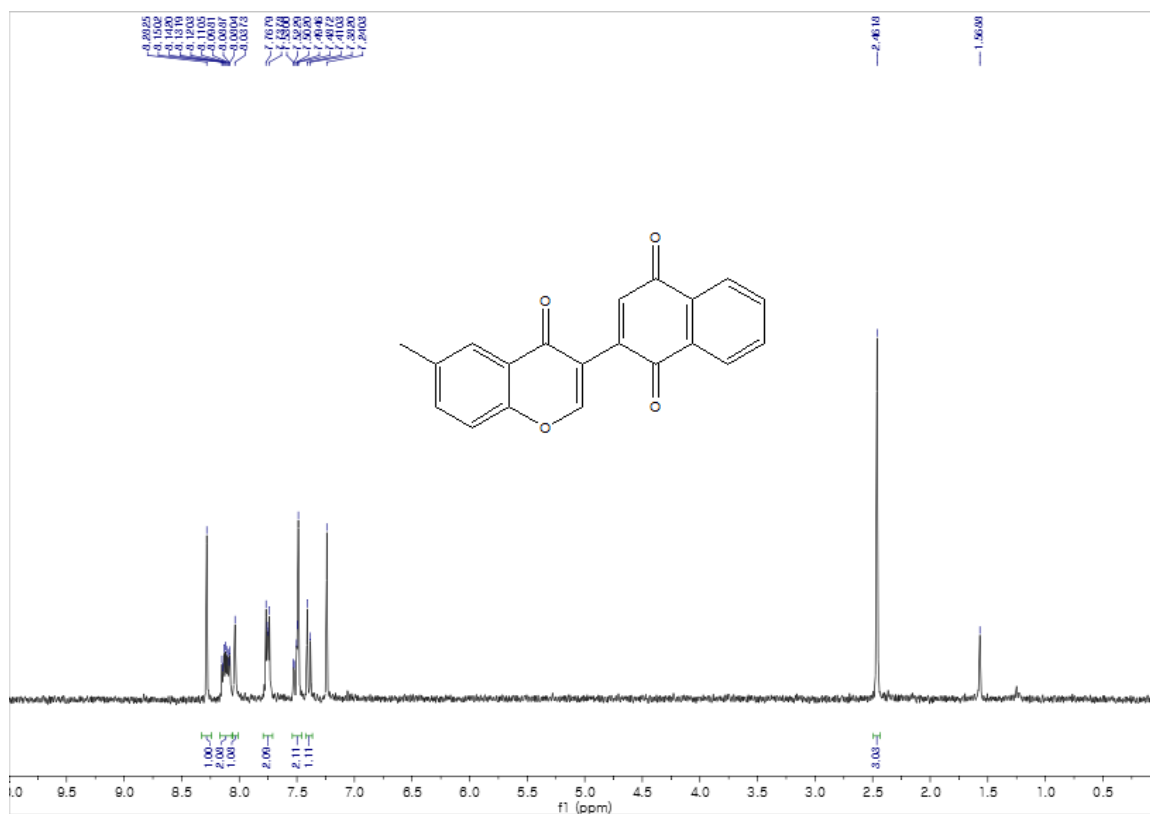

300 MHz,  $^1\text{H}$  NMR in  $\text{CDCl}_3$

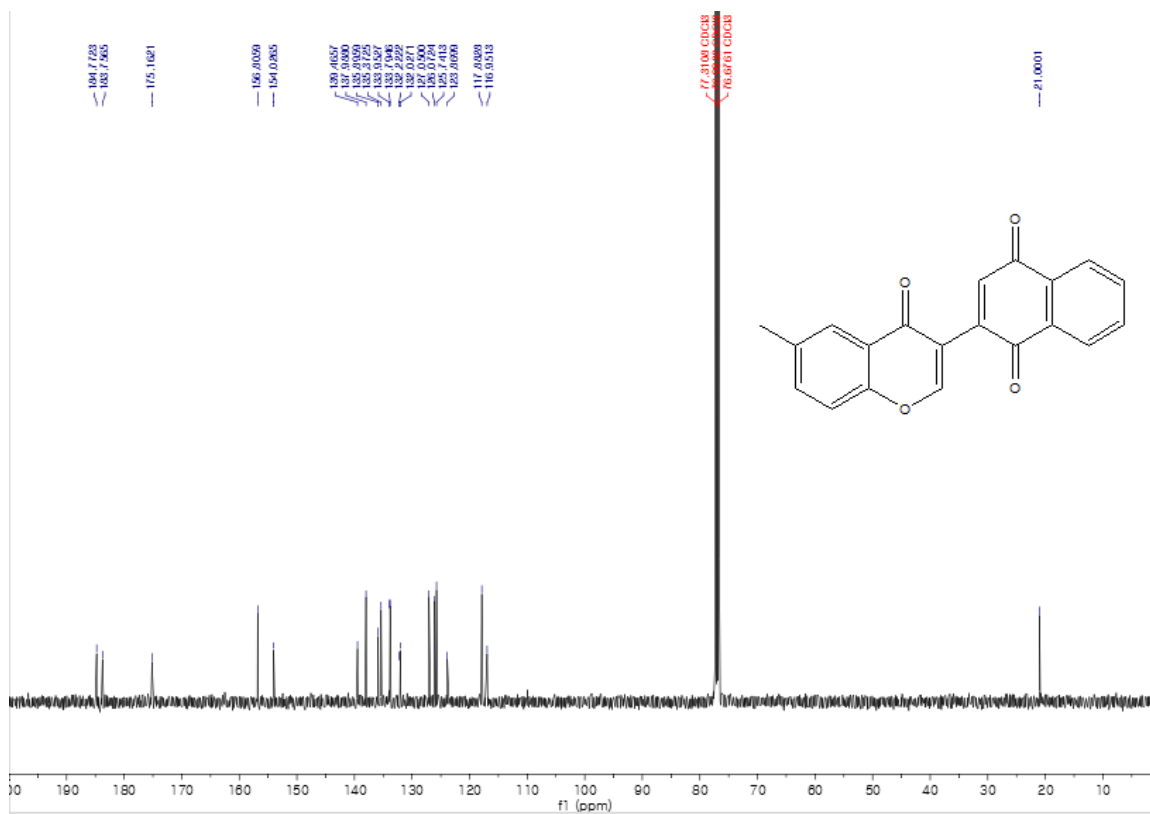

100 MHz,  $^{13}\text{C}$  NMR in  $\text{CDCl}_3$

2-(7-methoxy-4-oxo-4H-chromen-3-yl)naphthalene-1,4-dione (3t)

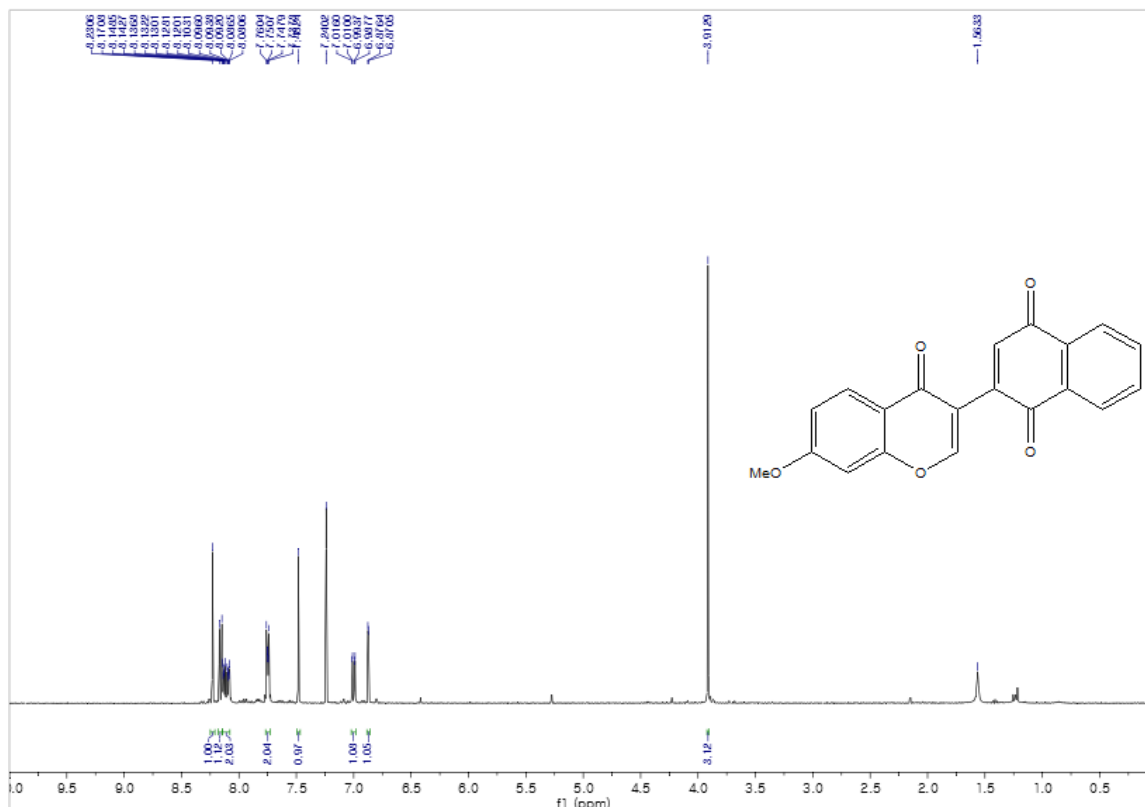

400 MHz,  $^1\text{H}$  NMR in  $\text{CDCl}_3$

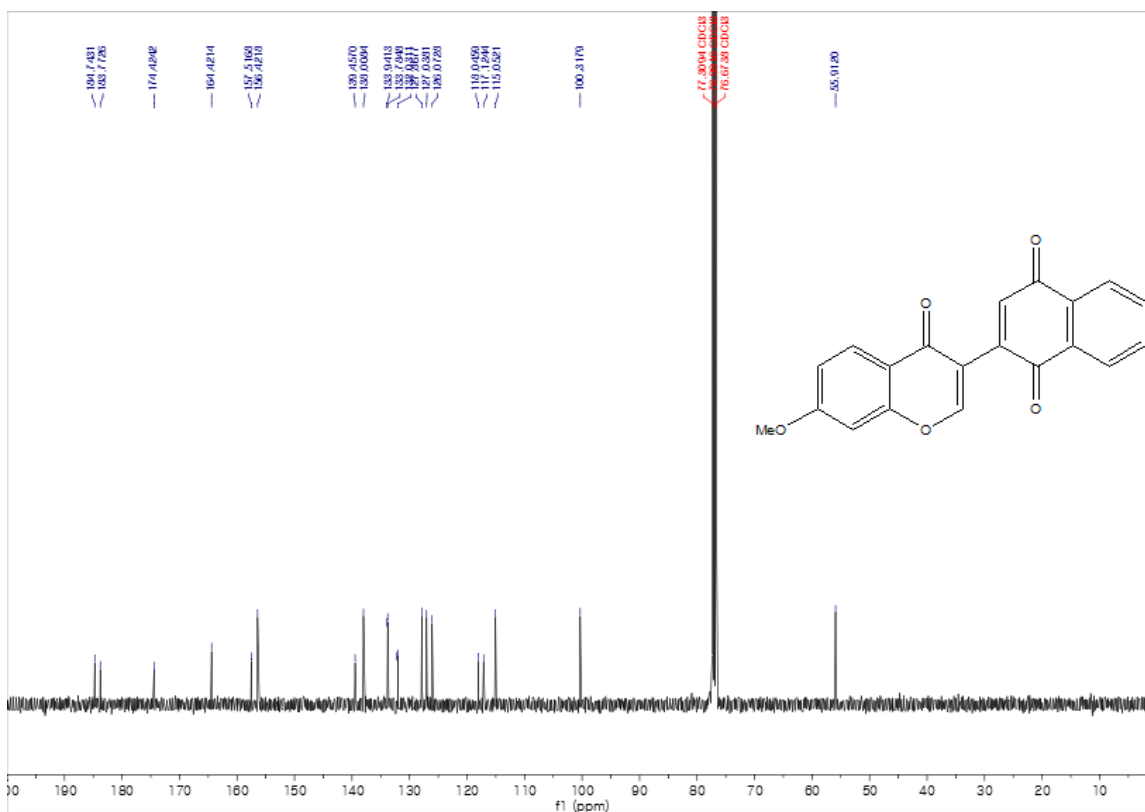

100 MHz,  $^{13}\text{C}$  NMR in  $\text{CDCl}_3$

**1-methyl-3-(6-methyl-4-oxo-4H-chromen-3-yl)-1H-pyrrole-2,5-dione (3u)**

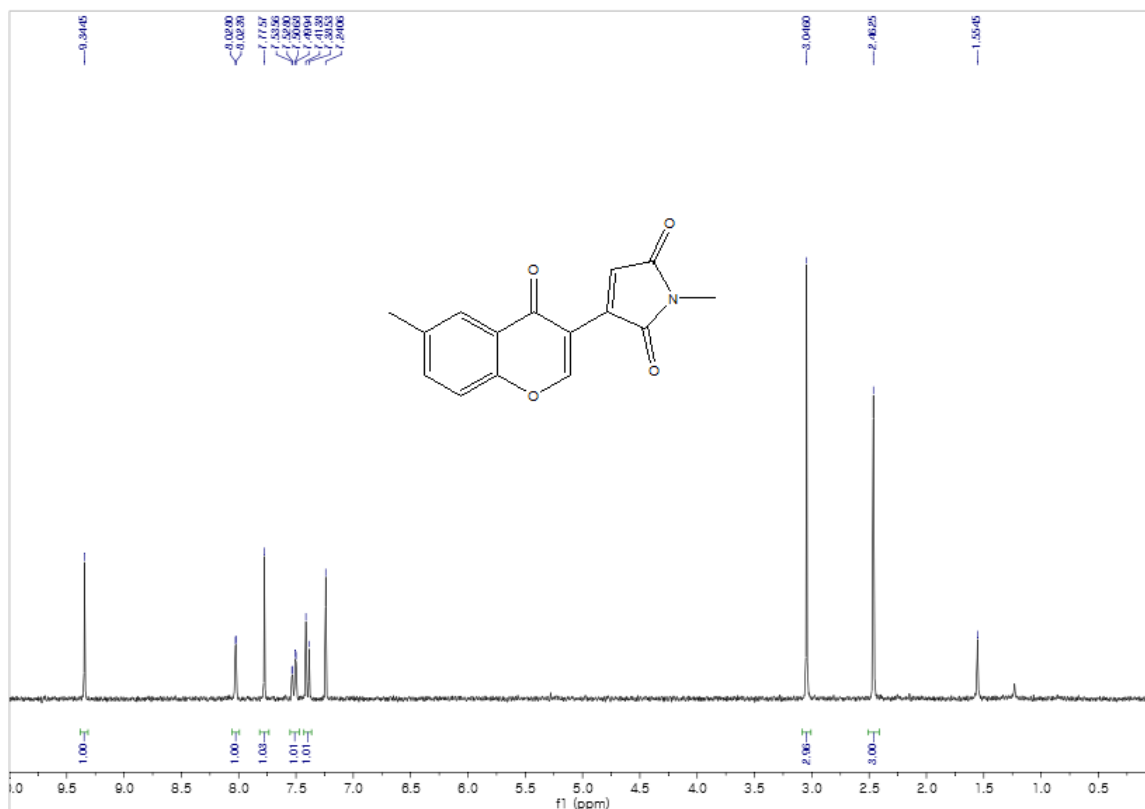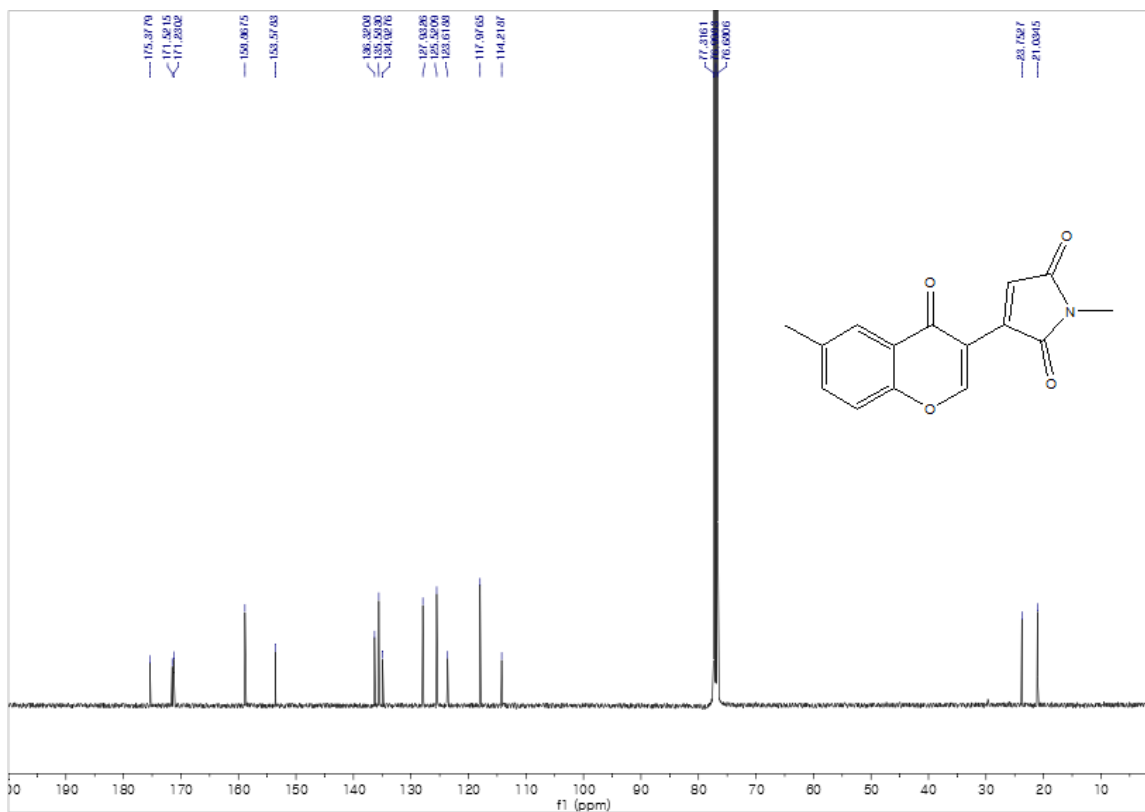

Supplement: c2cc33204c.pdf [file c2cc33204c.pdf]
